# Assessing the effects of non-pharmaceutical interventions on SARS-CoV-2 transmission in Belgium by means of an extended SEIQRD model and public mobility data

Tijs W. Alleman<sup>1,\*</sup>, Jenna Vergeynst<sup>1,2</sup>, Lander De Visscher<sup>2</sup>, Michiel Rollier<sup>2</sup>, Elena Torfs<sup>1</sup>, the Belgian Collaborative Group on COVID-19 Hospital Surveillance<sup>3,\*\*</sup>, Ingmar Nopens<sup>1</sup>, and Jan M. Baetens<sup>2</sup>

<sup>1</sup>BIOMATH, Department of Data Analysis and Mathematical Modelling, Ghent University, Coupure links 653, 9000 Gent, Belgium

<sup>2</sup>KERMIT, Department of Data Analysis and Mathematical Modelling, Ghent University, Coupure links 653, 9000 Gent, Belgium

<sup>3</sup>Department of Epidemiology and Public Health, Sciensano, BE-1050 Brussels, Belgium

\*Corresponding author: [tijs.alleman@ugent.be](mailto:tijs.alleman@ugent.be)

\*\* Amir-Samy Aouachria, Kristof Bafort, Leïla Belkhir, Koen Blot, Nathalie Bossuyt, Steven Callens, Vincent Colombie, Sarah Cooreman, Nicolas Dauby, Paul De Munter, Robby De Pauw, Pieter Depuydt, Didier Delmarcelle, Mélanie Deloalée, Rémy Demeester, Thierry Dugernier, Caroline Gheysen, Xavier Holemans, Benjamin Kerzmann, Sarah Loof, Pierre Yves Machurot, Geert Meyfroidt, Philippe Minette, Jean-Marc Minon, Saphia Mokrane, Catherine Nachtergal, Séverine Noirhomme, Denis Piérard, Camelia Rossi, Carole Schiroel, Erica Sermijn, Ben Serrien, Frank Staelens, Fabio Taccone, Filip Triest, Dominique Van Beckhoven, Eva Van Braeckel, Nina Van Goethem, Jens Van Praet, Anke Vanhoenacker, Roeland Verstraete, Elise Willems, Chloé Wyndham-Thomas

July 26, 2021

## Abstract

We present a compartmental extended SEIQRD metapopulation model for SARS-CoV-2 spread in Belgium. We demonstrate the robustness of the calibration procedure by calibrating the model using incrementally larger datasets and dissect the model results by computing the effective reproduction number at home, in workplaces, in schools, and during leisure activities. We find that schools are an important transmission pathway for SARS-CoV-2, with the potential to increase the effective reproduction number from  $R_e = 0.66 \pm 0.04$  (95 % CI) to  $R_e = 1.09 \pm 0.05$  (95 % CI) under lockdown measures. The model accounts for the main characteristics of SARS-CoV-2 transmission and COVID-19 disease and features a detailed representation of hospitals with parameters derived from a dataset consisting of 22 136 hospitalized patients. Social contact during the pandemic is modeled by scaling pre-pandemic contact matrices with Google Community Mobility data and with effectivity-of-contact parameters inferred from hospitalization data. The calibrated social contact model with its publically available mobility data, although coarse-grained, is a readily available alternative to social-epidemiological contact studies under lockdown measures, which were not available at the start of the pandemic.

**keywords:** SARS-CoV-2, age-stratified compartmental SEIQRD model, non-pharmaceutical interventions, Google Community Mobility data, effective reproduction number, model calibration, schools closure

## 1 INTRODUCTION

---

### 1 Introduction

1 After an initial outbreak in early 2020 in Wuhan, China, *Severe acute respiratory syndrome coro-*  
2 *navirus 2* (SARS-CoV-2) has spread globally [1]. SARS-CoV-2 is capable of sustained human-  
3 to-human transmission [2] and may cause severe disease and death, especially in older in-  
4 dividuals. The SARS-CoV-2 pandemic has, in general, shown a remarkably low incidence  
5 among children and young adults [3, 4, 5]. Furthermore, presymptomatic transmission is a  
6 major contributor to SARS-CoV-2 spread [6, 7]. Both on March 15th, 2020, and on October  
7 19th, 2020, the Belgian governments imposed social restrictions after testing & tracing meth-  
8 ods had failed to prevent the large-scale spread of SARS-CoV-2. Recently, pharmaceutical  
9 interventions under the form of vaccinations have become available. If natural immunity  
10 wanes or if SARS-CoV-2 further mutates, it is expected that SARS-CoV-2 will become en-  
11 demic [8]. Hence, there is a need for well-informed models and knowledge build-up to  
12 assist policymakers in choosing the best non-pharmaceutical and pharmaceutical interven-  
13 tions during future SARS-CoV-2 outbreaks.

14  
15 Currently, four other models exist to inform policymakers in Belgium. The agent-based  
16 model (ABM) of Willem et al. [9], the data-driven model by Barbe et al. [10] and the nation-  
17 level, age-stratified compartmental models of Abrams et al. [11] and Franco [12]. The models  
18 of Abrams et al. [11] and Franco [12] feature similar disease dynamics as our model but rely  
19 on different assumptions to model social contact. The different model outputs are currently  
20 combined into an ensemble to inform policymakers [13]. In the ensemble, each model fulfills  
21 a niche, for instance, the ABM of Willem et al. [9] is good for studying microscopic social be-  
22 havior, and was used to inform the optimal *household bubble* size. The model of Barbé excels  
23 at short-term forecasts while our model, together with the compartmental models of Abrams  
24 et al. [11] and Franco [12], are well-fit to study the long-term effects of population-wide in-  
25 terventions.

26  
27 In this work, we built a compartmental, age-stratified, nation-level model which accounts  
28 for the main characteristics of SARS-CoV-2 disease. The model features a detailed repre-  
29 sentation of hospitals with residence times and mortalities derived from a large dataset of  
30 hospitalized patients in Belgium. We built a social contact model which scales pre-pandemic  
31 contact matrices from a study by Willem et al. [14] with the Google Community Mobility  
32 data [15] and with effectivity-of-contact parameters derived from hospitalization data us-  
33 ing an *Markov Chain Monte Carlo* (MCMC) method [16]. Tardiness in compliance with social  
34 restrictions is included using a delayed-ramp model and waning of humoral immunity is  
35 included by estimating the rate of seroreversion from two serological datasets. We find that  
36 the combination of the deterministic epidemiological model, which incorporates rigid a pri-  
37 ori knowledge on disease dynamics, and the calibrated effectivity-of-contact parameters in

## 2.1 The extended SEIQRD-model

## 2 MATERIALS AND METHODS

38 the social contact model allows us to combine the ease of long-term extrapolation and sce-  
39 nario analysis of compartmental models with the flexibility of a data-driven model. The  
40 model does not require ad hoc tweaking and is computationally cheap, making it ideal to  
41 perform optimizations that require thousands of model evaluations. Further, due to the  
42 public nature of the Google Community Mobility data, the model provides a more rapidly  
43 deployable alternative to social epidemiological studies comparing mixing patterns during  
44 and after lockdown, such as Coletti et al. [17] for Belgium, which were not available at the  
45 start of the pandemic.

46

47 Using a hospitalization dataset of 22 136 *coronavirus disease 19* (COVID-19) patients in Belgian  
48 hospitals, we computed age-stratified hospital residence times and mortalities. Using the ob-  
49 tained parameters, we found the model was able to predict the total number of patients and  
50 the number of deceased patients in Belgian hospitals well. We calibrated the model to hos-  
51 pitalization data made publically available by the Belgian *Scientific Institute of Public Health*  
52 (Sciensano) and demonstrated the calibration procedure's robustness. We computed the  
53 basic reproduction numbers ( $R_0$ ) and the time to reach compliance to lockdown measures  
54 during both *coronavirus disease 2019* (COVID-19) waves in Belgium. The average time to for  
55 anti-SARS-CoV-2 antibodies to wane (seroreversion), was estimated as 9.2 months (IQR: 7.2  
56 - 12.1 months). Using the calibrated model, we computed the relative share of contacts and  
57 the effective reproduction numbers and found these to be in line with estimates from other  
58 authors at home, at school, at work and during leisure activities to asses their effect on SARS-  
59 CoV-2 spread during both 2020 COVID-19 waves. We observed a strong correlation between  
60 school re-opening and increases in SARS-CoV-2 transmission. More precisely, schools have  
61 the potential to increase the effective reproduction number from  $R_e = 0.67 \pm 0.04$  (95 % CI)  
62 to  $R_e = 1.09 \pm 0.05$  (95 % CI) under lockdown measures.

63

64 Throughout the work, Belgium is used as a case but the scope of the work is extendable to  
65 other countries. Since February 2021, the effects of new SARS-CoV-2 strains and pharmaceu-  
66 tical interventions (vaccines) need to be accounted for. For this purpose, a model extension  
67 was developed and is currently used in the aforementioned model ensemble [13]. However,  
68 due to the longevity of this work, we chose to limit the scope of this study to the effects of  
69 non-pharmaceutical interventions.

## 2 MATERIALS AND METHODS

---

## 70 2 Materials and methods

### 71 2.1 The extended SEIQRD-model

#### 72 2.1.1 Disease dynamics

73 The SEIR(D) model [18] is a compartmental model that subdivides the human population  
74 into four groups: 1. susceptible individuals (S), 2. exposed individuals in the latent phase  
75 (E), 3. infectious individuals capable of transmitting the disease (I) and 4. individuals re-  
76 moved from the population either through immunization or death (R/D). Despite being a  
77 simple and idealized reality, the SEIR(D) dynamics are used extensively to predict the out-  
78 break of infectious diseases and this was no different during the SARS-CoV-2 outbreak ear-  
79 lier this year [1, 3, 19].

80  
81 In this work, we extended the SEIRD model to incorporate more expert knowledge on SARS-  
82 CoV-2 disease dynamics. For that purpose, the infectious compartment was split into four  
83 parts. The first is a period of presymptomatic infectiousness because several studies have  
84 shown that presymptomatic transmission is a dominant transmission mechanism of SARS-  
85 CoV-2 [6, 7]. After the presymptomatic period, three possible infectious outcomes are mod-  
86 eled: (1) Asymptomatic outcome, for individuals who show no symptoms at all, (2) Mild  
87 outcome, for individuals with mild symptoms who recover at home, and (3) Hospitalization,  
88 when mild symptoms worsen. Children and young adults have a high propensity to experi-  
89 ence an asymptomatic or mild outcome, while older individuals have a higher propensity  
90 to be hospitalized [6, 7]. Belgian hospitals generally have two wards for COVID-19 patients:  
91 1) *cohort*, where patients are not monitored continuously and 2) *Intensive care units* (ICUs),  
92 for patients with the most severe symptoms. Intensive care includes permanent monitoring,  
93 the use of ventilators, or the use of extracorporeal membrane oxygenation (ECMO). Patients  
94 can perish in both hospital wards, but mortalities are generally lower in cohort. After a stay  
95 in an ICU, patients return to cohort for recovery in the hospital. During the recovery stay,  
96 mortality is limited. We assume that mildly infected individuals and hospitalized patients  
97 cannot infect susceptibles are thus quarantined. Because reinfections with SARS-CoV-2 have  
98 already been reported [20, 21, 22, 23], and because it has already been estimated that anti-  
99 SARS-CoV-2 antibodies wane [24, 25], we incorporate waning antibody immunity by send-  
100 ing recovered individuals back to the susceptible population pool. The model dynamics are  
101 depicted in Figure 1.

#### 102 2.1.2 Model structure and equations

103 In this work, we implemented the extended SEIQRD dynamics shown in Figure 1 using ordi-  
104 nary differential equations (ODEs), without spatial stratification and with age-stratification.

## 2.1 The extended SEIQRD-model

## 2 MATERIALS AND METHODS

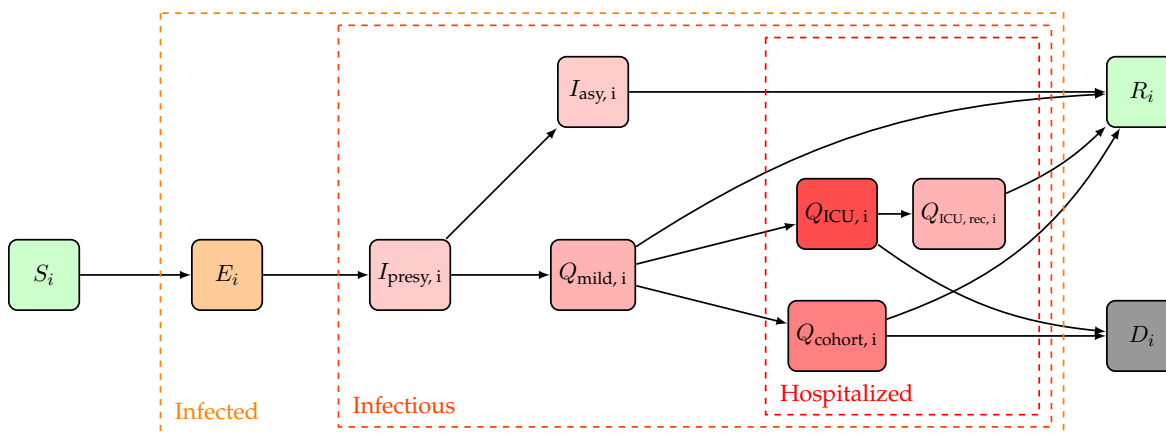

**Figure 1:** Extended SEIQRD dynamics used in this study. Here,  $S$  stands for susceptible,  $E$  for exposed,  $I_{presy}$  for presymptomatic and infectious,  $I_{asy}$  for asymptomatic and infectious,  $Q_{mild}$  for mildly symptomatic and infectious,  $Q_{cohort}$  for cohort,  $Q_{ICU,rec}$  for a recovery stay in cohort coming from ICU,  $Q_{ICU}$  for Intensive Care Unit,  $D$  for dead and  $R$  for recovered. A subscript  $i$  is used to denote the  $i$ th age strata of the model, the model has a total of nine age strata. An overview of the model parameters can be found in table 1.

105 This was accomplished by defining a system of  $K \times N$  ordinary differential equations, one  
 106 for every of the  $K = 10$  model compartments, each of which is further split into  $N = 9$   
 107 age-stratified metapopulations. The age groups have different contact rates with other age  
 108 groups and the disease progresses differently for each age group, making the model behave  
 109 realistically. Our model consists of 9 age classes, i.e.,  $[0, 10($ ,  $[10, 20($ ,  $[20, 30($ ,  $[30, 40($ ,  $[40, 50($ ,  
 110  $[50, 60($ ,  $[60, 70($ ,  $[70, 80($ ,  $[80, \infty($ . The advantage of using ODEs over network- or agent-  
 111 based models are the limited computational resources required to explore scenarios and  
 112 perform optimizations that require thousands of function evaluations. The disadvantage  
 113 is the assumption of homogeneous mixing, i.e. every individual is equally likely to come  
 114 into contact with another individual. More realistic approaches are spatial patch models,  
 115 network-based models, agent-based models, or combinations thereof. However, these come  
 116 at a substantial computational cost. Because Belgium is a small and heavily urbanized coun-  
 117 try, a spatially explicit model becomes relevant at very low SARS-CoV-2 prevalence. The  
 118 macroscopic coarse-graining of homogeneous mixing works well to describe major COVID-  
 119 19 waves but is less fit for monitoring the disease at low prevalence. The model dynamics  
 120 are translated into the following system of coupled ordinary differential equations,

## 2 MATERIALS AND METHODS

### 2.1 The extended SEIQRD-model

$$\dot{S}_i = -\beta S_i \sum_{j=1}^N N_{c,ij} \left( \frac{I_{\text{presy},j} + I_{\text{asy},j}}{T_j} \right) + \zeta R_i, \quad (1)$$

$$\dot{E}_i = \beta S_i \sum_{j=1}^N N_{c,ij} \left( \frac{I_{\text{presy},j} + I_{\text{asy},j}}{T_j} \right) - (1/\sigma) E_i, \quad (2)$$

$$\dot{I}_{\text{presy},i} = (1/\sigma) E_i - (1/\omega) I_{\text{presy},i}, \quad (3)$$

$$\dot{I}_{\text{asy},i} = (a_i/\omega) I_{\text{presy},i} - (1/d_a) I_{\text{asy},i}, \quad (4)$$

$$\dot{Q}_{\text{mild},i} = ((1 - a_i)/\omega) I_{\text{presy},i} - ((1 - h_i)/d_m + h_i/d_{\text{hosp}}) Q_{\text{mild},i}, \quad (5)$$

$$\dot{Q}_{\text{cohort},i} = (c_i h_i/d_{\text{hosp}}) Q_{\text{mild},i} - (m_{C,i}/d_{C,D,i}) Q_{\text{cohort},i} \quad (6)$$

$$-((1 - m_{C,i})/d_{C,R,i}) Q_{\text{cohort},i}, \quad (7)$$

$$\dot{Q}_{\text{ICU},i} = ((1 - c_i) h_i/d_{\text{hosp}}) Q_{\text{mild},i} - (m_{\text{ICU},i}/d_{\text{ICU},D,i}) Q_{\text{ICU},i} \quad (8)$$

$$-((1 - m_{\text{ICU},i})/d_{\text{ICU},R,i}) Q_{\text{ICU},i} \quad (9)$$

$$\dot{Q}_{\text{ICU,rec},i} = ((1 - m_{\text{ICU},i})/d_{\text{ICU},R,i}) Q_{\text{ICU},i} - (1/d_{\text{ICU,rec},i}) Q_{\text{ICU,rec},i}, \quad (10)$$

$$\dot{R}_i = (1/d_a) I_{\text{asy},i} + ((1 - h_i)/d_m) Q_{\text{mild},i} + ((1 - m_{C,i})/d_{C,R,i}) Q_{\text{cohort},i} \quad (11)$$

$$+ (1/d_{\text{ICU,rec},i}) Q_{\text{ICU,rec},i} - \zeta R_i, \quad (12)$$

$$\dot{D}_i = (m_{\text{ICU},i}/d_{\text{ICU},D,i}) Q_{\text{ICU},i} + (m_{C,i}/d_{C,D,i}) Q_{\text{cohort},i}, \quad (13)$$

for  $i = 1, 2, \dots, 9$ . Here,  $T$  stands for total population (Table 1),  $S$  stands for susceptible,  $E$  for exposed,  $I_{\text{presy}}$  for presymptomatic and infectious,  $I_{\text{asy}}$  for asymptomatic and infectious,  $Q_{\text{mild}}$  for mildly symptomatic and infectious,  $H_{\text{cohort}}$  for cohort,  $H_{\text{ICU,rec}}$  for a recovery stay in cohort coming from Intensive Care,  $H_{\text{ICU}}$  for Intensive Care Unit,  $D$  for dead and  $R$  for recovered. A subscript to these variables is used to refer to one of the nine age strata in the model. Using the above notation, all model states are 9-dimensional vectors,

$$\mathbf{S} = [S_1(t) \ S_2(t) \ \dots \ S_i(t)],$$

121 where  $S_i(t)$  denotes the number of susceptibles in age-class  $i$  at time  $t$  after the introduction  
 122 of SARS-CoV-2 in the population. As initial condition, the whole population is assumed  
 123 susceptible to SARS-CoV-2 and one exposed individual and one pre-symptomatic infectious  
 124 individual in every age class is assumed, so  $E_i(0) = I_i(0) = 1$  for all  $i = 1, 2, \dots, 9$ . The  
 125 time between the start of the simulation and the start of data collection is then estimated  
 126 when calibrating the model. An overview of all model parameters, their values, and their  
 127 meaning can be found in table 1. In what follows, the most important model parameters and  
 128 their chosen values are motivated.

#### 129 2.1.3 Model parameters

130 **Transmission rate and social contact data** The transmission rate of the disease depends on  
 131 the product of four contributions (Equation 1). The first contribution,  $(I_{\text{presy},j} + I_{\text{asy},j})/T_j$ , is

## 2.1 The extended SEIQRD-model

## 2 MATERIALS AND METHODS

132 the fraction of contagious individuals in age group  $j$ . We thus assume presymptomatic and  
133 asymptomatic individuals spread the disease, while mildly infected are assumed to self-  
134 quarantine and hospitalized individuals cannot infect health care workers. The second con-  
135 tribution,  $N_{c,ij}$ , is the average number of human-to-human interactions of an individual in  
136 age group  $i$ , with an individual in age group  $j$  per day. The sum of the first two contributions  
137 over all age groups  $j$ ,  $\sum_{j=1}^N N_{c,ij}(I_{\text{presy},j} + I_{\text{asy},j})/T_j$ , is the number of contacts of an individual  
138 in age group  $i$  that can result in SARS-CoV-2 transmission. This is multiplied with the num-  
139 ber of susceptibles in age group  $i$  ( $S_i$ ), and with  $\beta$ , the probability of contracting COVID-19  
140 when encountering a contagious individual, to compute the number of effective contacts at  
141 every timestep. We assume that the per-contact transmission probability  $\beta$  is independent  
142 of age and we infer its value by calibrating our model to Belgian hospitalization data. In a  
143 model-based inference-based study by Davies et al. [3], it was deduced that children were  
144 less susceptible to SARS-CoV-2 disease. Viner et al. [26] analyzed 32 studies that reported  
145 on the susceptibility of children and found preliminary evidence that susceptibility to SARS-  
146 CoV-2 infection is lower in children. However, it assumed in our model that individuals of  
147 all ages to have an equal susceptibility to and transmissibility of SARS-CoV-2. The number  
148 of (pre-pandemic) human-human interactions,  $N_c$ , are both place and age-dependent. These  
149 matrices assume the form of a  $9 \times 9$  *interaction matrix* where an entry  $i, j$  denotes the number  
150 of social contacts age group  $i$  has with age group  $j$  per day. These matrices are available for  
151 homes ( $N_{c, \text{home}}$ ), schools ( $N_{c, \text{schools}}$ ), workplaces ( $N_{c, \text{work}}$ ), in public transport ( $N_{c, \text{transport}}$ ),  
152 during leisure activities ( $N_{c, \text{leisure}}$ ) and during other activities ( $N_{c, \text{others}}$ ), from a study by  
153 Willem et al. [14]. The total number of prepandemic social interactions must be translated  
154 into an appropriately weighted sum of the contributions in different places, adequately de-  
155 scribing pandemic social behavior (Section 2.3). The basic reproduction number  $R_0$ , defined  
156 as the expected number of secondary cases directly generated by one case in a population  
157 where all individuals are susceptible to infection, is computed using the next-generation  
158 matrix (NGM) approach introduced by Diekmann et al. [27, 28]. For our model, the basic  
159 reproduction number of age group  $i$  is,

$$R_{0,i} = (a_i d_a + \omega) \beta \sum_{j=1}^N N_{c,ij} \quad (14)$$

160 and the population basic reproduction number is calculated as the weighted average over  
161 all age groups using the demographic data in Table 1. The detailed algebra underlying the  
162 computation of Equation 14 is presented in the supplementary materials (Section A.4).

163 **Infectiousness** The duration of infectiousness is determined by the number of days pa-  
164 tients can spread viral particles. Several studies have reported patients have the highest  
165 viral load of the coronavirus at the time they are diagnosed and patient's viral loads declin-  
166 ing gradually over time [29, 30, 31, 32, 33]. He et al. [29] inferred the infectiousness profile



## 2 MATERIALS AND METHODS

### 2.1 The extended SEIQRD-model

167 of COVID-19 patients to be an approximately normal distribution, with the peak infectivity  
168 roughly at the time of symptom onset and infectiousness quickly declining within 7 days  
169 after symptom onset. A comparison of viral load between symptomatic and one asymp-  
170 tomatic case revealed similar viral loads, an indicator that asymptomatic individuals can  
171 be as infectious as symptomatic patients [33]. He et al. [29] further concluded that 44 % of  
172 secondary cases were infected during the presymptomatic stage, a finding consistent with  
173 studies from other authors [6, 7]. Wei et al. [7] determined that presymptomatic transmission  
174 exposure occurred 1-3 days before the source patient developed symptoms. In Equation 2,  
175  $\sigma$  denotes the length of the latent, non-infectious period and in Equation 3,  $\omega$  is the length of  
176 the presymptomatic infectious period. In this work, we assume the incubation period, equal  
177 to  $\omega + \sigma$ , lasts 5.2 days [6]. The length of the presymptomatic period is fixed at 0.7 days,  
178 which corresponds to 44 % of SARS-CoV-2 infections experiencing a presymptomatic infec-  
179 tious period of 2 days. The duration of infectiousness for mildly symptomatic cases ( $d_m$ ) is  
180 assumed to be 7 days. The average duration of asymptomatic infectiousness, on which the  
181 basic reproduction number ( $R_0$ ) depends (Equation 14), will be inferred from hospitalization  
182 data using an MCMC method (Section 2.4).

183 **Disease severity and hospitalizations** The model parameter  $a_i$  (Equation 4) is the prob-  
184 ability of an individual in age group  $i$  having a subclinical infection. Several authors have  
185 attempted to estimate the fraction of asymptomatic infections. Li et al. [34] estimated that  
186 86 % of coronavirus infections in China were *undocumented* in the weeks before their govern-  
187 ment instituted stringent quarantines. However, this figure includes an unknown number  
188 of mildly symptomatic cases and is thus an overestimation of the asymptomatic fraction. In  
189 Iceland, citizens were invited for testing regardless of symptoms. Of all people with positive  
190 test results, 43 % were subclinical [35]. A systematic review and meta-analysis by Buitrago-  
191 Garcia et al. [36] suggested a lower subclinical fraction of 31 % (26 % - 37 %, 95 % CI). If the  
192 subclinical fractions per age group estimated by Davies et al. [3] are applied to the Belgian  
193 population, an average subclinical fraction of 57 % is obtained for Belgium. In this study, we  
194 applied the relative subclinical fraction per age group of Wu et al. [37] to obtain a population  
195 average subclinical fraction of 57 % (Table 1). In Equation 5,  $h$  is the fraction of mild cases that  
196 require hospitalization and in Equation 8,  $c$  is the fraction of the hospitalized which remain  
197 in cohort. In this study, the age-stratified hospitalization probabilities ( $h$ ) were inferred from  
198 hospital mortality data (Table 1) and the age-stratified distributions between cohort and ICU  
199 ( $c$ ) were computed using data from 22 136 patients treated in Belgian hospitals (Section 2.2).  
200 In Equation 5,  $d_{\text{hosp}}$  is the average time between first symptoms and hospitalization, which  
201 was previously estimated as 5-9 days by Linton et al. [38] and as 4 days by To et al. [32]. In  
202 Equations 8, 9 and 10,  $d_{C,R}$ ,  $d_{C,D}$ ,  $d_{ICU,R}$  and  $d_{ICU,D}$  are the age-stratified average lengths of a  
203 hospital stay in cohort and in an ICU. The subscript  $R$  denotes the duration if the patient re-  
204 covers, while subscript  $D$  denotes the duration if the patient perishes.  $m_C$  and  $m_{ICU}$  are the

## 2.2 Analysis of hospital surveillance data

## 2 MATERIALS AND METHODS

age-stratified mortalities of patients in cohort and in ICU. In Equation 10,  $d_{ICU,rec}$  denoted the age-stratified length of a recovery stay in cohort after a stay in ICU. The aforementioned hospitalization parameters are computed using data from 22 136 patients treated in Belgian hospitals. The methodology of the analysis is presented in Section 2.2, the results of the analysis are presented in Section 3.1

**Testing, tracing and quarantine, waning antibody immunity** The effects of testing, tracing and quarantine are not explicitly implemented for this study. Reinfections with SARS-CoV-2 have been reported in single cases in the USA [20], Ecuador [21] and Belgium [22]. Further, two asymptomatic reinfections were also reported in Indian healthcare workers [23]. Rosado et al. [24] estimated that antibodies could wane in 50% of recovered individuals after 1 year. Wheatley et al. [25] found that both neutralizing and binding antibody responses decay after recovery from a mild COVID-19 infection. Although the long-term kinetics of the antibody response to SARS-CoV-2 will not be definitively quantified until infected individuals are followed years after a confirmed infection, and although the persistence of serum antibodies is unlikely to be the sole determinant of long-lasting immunity (memory T and B cells), it is clear that waning of antibodies best be included in our model. In Equations 1 and 12, the rate of anti-SARS-CoV-2 antibody waning is denoted as  $\zeta$ , and its inverse is the average time for anti-SARS-CoV-2 antibodies to wane. Using serological data by Herzog et al. [39] and the *Belgian Scientific Institute of Public Health* (Sciensano), the distribution of  $\zeta$  will be inferred using an MCMC method.

### 2.2 Analysis of hospital surveillance data

A subset of data from the Belgian COVID-19 clinical surveillance on hospitalizations by Van Goethem et al. [40], which was anonymized and provided through a secured data transfer platform by the *Belgian Scientific Institute of Public Health* (Sciensano), is analyzed to compute age-stratified estimates of the following model parameters: the distribution between the cohort and IC wards ( $c$ ), the residence times in the cohort and IC wards, in the case of recovery and in the case of death ( $d_{C,R}$ ,  $d_{C,D}$ ,  $d_{ICU,R}$ ,  $d_{ICU,D}$ ), the residence time for a recovery stay in cohort after a stay in ICU ( $d_{ICU,rec}$ ), the time between symptom onset and hospitalization ( $d_{hospital}$ ) and the mortalities in the hospital, cohort and IC wards ( $m_{C,ICU}$ ,  $m_C$ ,  $m_{ICU}$ ). The raw data consists of 52 327 patients hospitalized in Belgian hospitals between March 4th, 2020, and March 3rd, 2021. Data are reported for all hospitalized patients with a confirmed COVID-19 infection (diagnosed using reverse transcriptase-polymerase chain reaction, chest computed tomography, or rapid antigen test) and the reporting coverage on the period 15th of March - 27th of June was estimated to be rough 70 % of all hospitalized COVID-19 cases [40]. The data gathered during the period March 14th, 2020 until June 12th, 2020 were previously analyzed by Faes et al. [41]. The added value of performing a similar analysis in this study is threefold: 1) To include the patient data gathered in the meantime. 2) To com-

## 2 MATERIALS AND METHODS

### 2.3 Social contact model

242 pute the age-stratified mortalities in the cohort and IC hospital wards ( $m_C, m_{ICU}$ ), as well  
243 as the age-stratified recovery time in cohort after a stay in ICU ( $d_{ICU,rec}$ ), which were not  
244 included by Faes et al. [41]. 3) To obtain age-stratified estimates in nine ten-year age strata  
245 as compared to four age strata by Faes et al. [41]. For every patient the following data were  
246 provided: 1) age, 2) sex, 3) date of onset of symptoms 4) hospital admission date, 5) hospi-  
247 tal discharge date, 6) date of ICU transfer, 7) the number of days spent in ICU, 8) outcome  
248 (recovered or deceased). Data from 30 191 patients were excluded from the analysis because  
249 one or more of the above entries were missing or because the computed residence times  
250 were negative. Patients that came from a nursing home were excluded from the analysis  
251 because their inclusion skewed the model predicted number of hospital deaths when the ob-  
252 tained hospitalization parameters were propagated in the model. Thus, in total, data from  
253 the remaining 22 136 patients were used (Figure 14). The confidence intervals of the mortal-  
254 ities ( $m_{C,ICU}, m_C$  and  $m_{ICU}$ ) and the distribution between the cohort and IC ward ( $c$ ) were  
255 computed using bootstrap resampling. For all hospital residence times, the shape and scale  
256 parameters of a Weibull distribution were fitted to the data. To determine if the duration of  
257 a cohort or ICU stay differed significantly and to determine if the mortalities in cohort and  
258 ICU differed significantly, the non-parametric Mann-Whitney U-test was used. Temporal  
259 changes in the estimated hospitalization parameters are not considered in this study. The  
260 results of the analysis are presented in Section 3.1.

### 261 2.3 Social contact model

262 As previously mentioned, the social behavior of the Belgian population must be translated  
263 into a linear combination of the aforementioned pre-pandemic interaction matrices. Mathe-  
264 matically, we must find tangible coefficients so that the linear combination of pre-pandemic  
265 interaction matrices, i.e.,

$$N_c = \alpha N_{c,home} + \beta N_{c,schools} + \gamma N_{c,work} + \delta N_{c,transport} + \epsilon N_{c,leisure} + \phi N_{c,others}, \quad (15)$$

266 is a good representation of macroscopic social behaviour during the pandemic. Instead of us-  
267 ing pre-pandemic contact matrices, modelers would ideally use pandemic contact matrices  
268 to build disease models as these are expected to better represent mixing behaviour under  
269 lockdown measures. Although these new contact studies under social restrictions will be  
270 valuable during future pandemics, such matrices were not available at the start of the pan-  
271 demic. Hence, our model builds upon pre-pandemic knowledge of social behaviour to make  
272 a prediction on pandemic social behavior.

273 **Mobility reductions** Google's Community Mobility Reports (GCMRs) collates data from  
274 smartphone users accessing Google applications who allow recording of their *location history*  
275 [42]. The data are categorised into six discrete categories: 1) *retail and recreation*, 2) *parks*, 3)

### 2.3 Social contact model

## 2 MATERIALS AND METHODS

276 groceries and pharmacies, 4) workplaces, 5) transport and 6) residential areas. The GCMRs pro-  
277 vide the percentage change in activity at each location category compared to that on baseline  
278 days before the start of the COVID-19 pandemic (a 5-week period running from 3 January  
279 2020 to 6 February 2020) [15]. The values thus represent the relative change compared to the  
280 baseline, and not the absolute number of visitors. The GCMRs are not age-stratified and do  
281 not correct for potential underrepresentation of older individuals in the data collection. In  
282 our model, the GCMRs for Workplaces, Transit stations, Retail & recreation and Groceries  
283 & pharmacy are used as proxies to scale the work ( $N_{c, \text{work}}$ ), transport ( $N_{c, \text{transport}}$ ), leisure  
284 ( $N_{c, \text{leisure}}$ ) and other ( $N_{c, \text{others}}$ ) social contact matrices.

285  
286 Two surges in COVID-19 cases were observed in Belgium, resulting in two lockdowns (Fig-  
287 ure 2). The first lockdown was imposed on March 15th, 2020, and lasted until May 4th, 2020,  
288 and involved the closure of schools, bars, clubs, restaurants, all non-essential shops, and a  
289 closure of the border to non-essential travel (Table 2). From May 4th, 2020 until July 1st, 2020  
290 the lockdown was gradually lifted. During the first lockdown, schools remained fully closed  
291 until May 18th, 2020, and were only re-opened to a very limited extent before the end of the  
292 school year on July 1st, 2020. The second lockdown was imposed on October 19th, 2020,  
293 and is still ongoing at the time of writing. Schools were closed on November 2nd, 2020, and  
294 re-opened on November 16th, 2020. Further, schools were closed during the Christmas hol-  
295 idays from December 18th, 2020 until January 4th, 2021. Universities remained fully closed  
296 since October 19th, 2020. Briefly summarized, the first 2020 COVID-19 wave consisted of 1) a  
297 rapid surge in cases, 2) a lockdown, and 3) a release of lockdown measures. The second 2020  
298 COVID-19 wave consisted of 1) a rapid surge in cases, 2) a lockdown with schools closed, 3)  
299 a lockdown with varying school policies. A more detailed overview of all key events in Bel-  
300 gium during the COVID-19 pandemic is provided in the supplementary materials (Section  
301 A.3).

302  
303 During both lockdowns, mobility increases in the categories *residential* and *parks* were ob-  
304 served (Figure 2). These are indicative of decreased mobility, as these suggest increased  
305 activity around the home environment. The other four categories are more indicative of  
306 general mobility as they are related to activity around workplaces, retail outlets and use of  
307 public transportation [43]. Thus, although the mobility figures indicate people spent more  
308 time at home, this does not mean people have more contacts at home (especially under  
309 stay-at-home orders). Amplifying the fraction of household contacts under lockdown mea-  
310 sures would increase intergenerational mixing of the population under lockdown, which is  
311 unrealistic and will lead to overestimations of the hospitalizations. The inability to accu-  
312 rately capture the disease spread in home *bubbles* under lockdown measures is an inherent  
313 downside of compartmental epidemiological models. We have thus not scaled the home  
314 interaction matrix ( $N_{c, \text{home}}$ ) with the residential mobility from the GCMRs.

## 2 MATERIALS AND METHODS

### 2.3 Social contact model

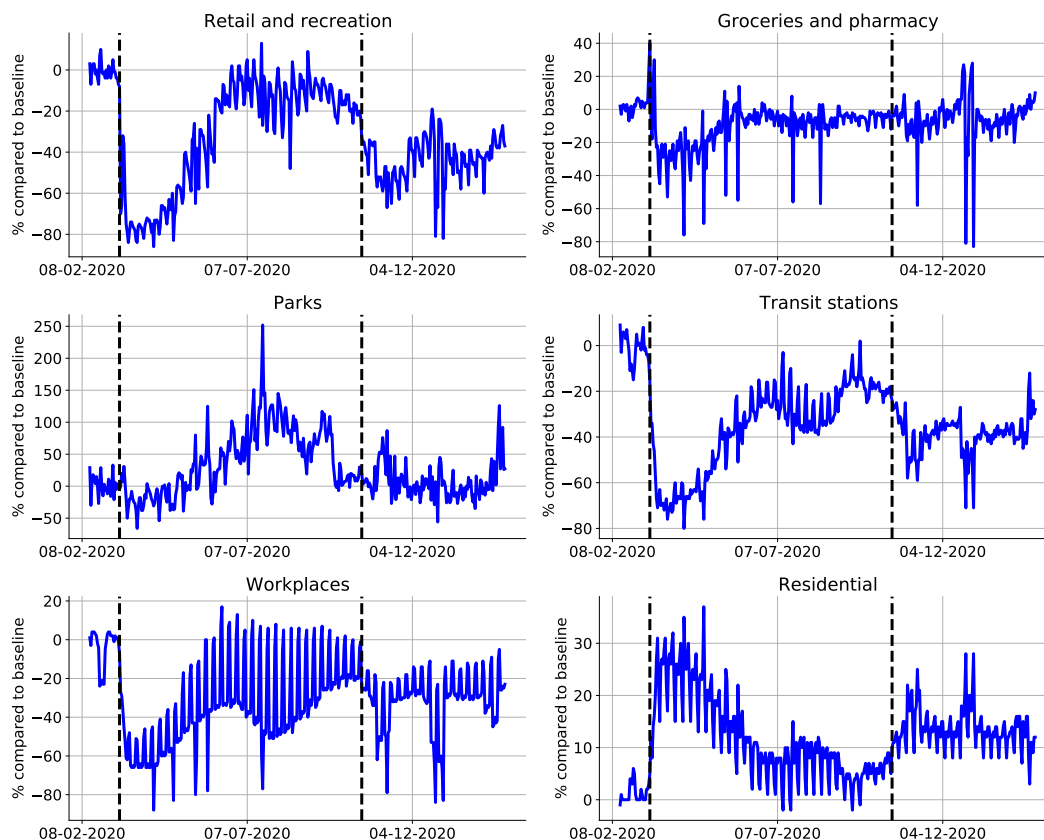

**Figure 2:** Mobility data extracted from the *Google Community Mobility Reports*. Dashed lines indicate the start of the first lockdown on Friday, March 13th, 2020, and the start of the second lockdown on Monday, October 19th, 2020. Increases in the categories *residential* and *parks* suggest increased activity around the home environment, while increases in the other categories are more indicative of increases in general mobility [43]. The mobility reduction in *workplaces* is used to scale the work interaction matrix, the *retail & recreation* reduction is used to scale the leisure interaction matrix, the *groceries & pharmacy* reduction is used to scale the other interaction matrix, the *transit stations* reduction is used to scale the public transport mobility matrix.

315 **Effectivity parameters** During the first lockdown, we estimated that the overall fraction  
 316 of the social contacts that contributed to SARS-CoV-2 spread, from hereon referred to as the  
 317 *effectiveness* of the contacts ( $\Omega$ ), was approximately one third of what would be expected  
 318 based on the GCMRs reductions and the pre-pandemic contacts. Over the course of the first  
 319 lockdown, work mobility decreased by 56 %, the public transport mobility decreased by 65  
 320 %, leisure mobility decreased by 72 % and grocery (others) mobility decreased by 26 % (Table

### 2.3 Social contact model

## 2 MATERIALS AND METHODS

321 2). Mathematically,

$$N_c = \underbrace{\Omega}_{\approx 0.30} \left[ N_{c, \text{home}} + (1-0.56)N_{c, \text{work}} + (1-0.65)N_{c, \text{transport}} + (1-0.72)N_{c, \text{leisure}} + (1-0.26)N_{c, \text{others}} \right], \quad (16)$$

322 Intuitively, the effectivity of a contacts may not scale linearly with the observed mobility  
 323 reductions. The net effectivity of the contacts under lockdown measures depends on a com-  
 324 bination of the pre-pandemic physical proximity and duration of the contact, the effectivity  
 325 of preventive measures and on behavioural changes. As an example, the effects of alcohol  
 326 gel and face masks might be large in the workplace and in grocery stores, but not at home or  
 327 during leisure activities. To account for different effectivities of contacts in different places,  
 328 we could introduce one additional parameter per contact matrix, bound between zero and  
 329 one, and infer its distribution from the available hospitalization data. However, estimating  
 330 six effectivity parameters was unfeasible because of identifiability issues. We determined  
 331 that the effectivity parameters of public transport and other places could not be identified.  
 332 This is most likely because very little contacts are made in those places [44]. Consequently,  
 333 the effectivity parameters of public transport, other places and leisure contacts were aggre-  
 334 gated to reduce the number of effectivity parameters from six to four. Finally, the linear  
 335 combination of interaction matrices used to represent social contact under lockdown mea-  
 336 sures is,

$$N_c(t) = \Omega_{\text{home}}N_{c, \text{home}} + \Omega_{\text{schools}}H_{\text{schools}}(t)N_{c, \text{schools}} + \Omega_{\text{work}}G_{\text{work}}(t)N_{c, \text{work}} + \Omega_{\text{rest}} \left[ G_{\text{transit}}(t)N_{c, \text{transport}} + G_{\text{retail \& recreation}}(t)N_{c, \text{leisure}} + G_{\text{grocery \& pharmacy}}(t)N_{c, \text{others}} \right]. \quad (17)$$

337 Here,  $N_{c, \text{home}}$ ,  $N_{c, \text{schools}}$ ,  $N_{c, \text{work}}$ ,  $N_{c, \text{transport}}$ ,  $N_{c, \text{leisure}}$  and  $N_{c, \text{others}}$  denote the pre-pandemic  
 338 contact matrices at home, in schools, in workplaces, on public transport, during leisure ac-  
 339 tivities and during other activities [14].  $G_{\text{work}}$ ,  $G_{\text{transit}}$ ,  $G_{\text{retail \& recreation}}$  and  $G_{\text{grocery \& pharmacy}}$   
 340 denote the GCMRs mobility reductions in the respective categories and our updated at every  
 341 timestep in the simulations.  $H_{\text{schools}}$  denotes the fraction of schools opened, as school open-  
 342 ing cannot be deduced from the GCMRs. In spite of their limited re-opening on May 18th,  
 343 2020, schools are assumed to be closed during the first lockdown.  $\Omega_{\text{home}}$ ,  $\Omega_{\text{schools}}$ ,  $\Omega_{\text{work}}$ ,  
 344  $\Omega_{\text{rest}}$  are the effectivity parameters at home, in schools, at work and during leisure, public  
 345 transport and other activities.

346 **Obedience to measures** In reality, compliance to social restrictions is gradual and cannot  
 347 be modeled using a step-wise change of the social interaction matrix  $N_c(t)$  (Section 2.1.3).  
 348 This can be seen upon close inspection of the GCMRs after lockdown measures were taken  
 349 (Figure 2). Because Google mobility data are updated daily in the model, the effect of gradual  
 350 mobility changes is inherently included. However, the added value of a social compliance

## 2 MATERIALS AND METHODS

### 2.4 Parameter identification and model predictions

351 model is to gradually introduce the effects of the effectivity parameters in the model. Fur-  
352 ther, since the compliance model parameters will be estimated from hospitalization data, the  
353 added degrees of freedom aid in obtaining a better model fit to the peak hospitalizations. In  
354 our model, we use a delayed ramp to model compliance, i.e.,

$$N_c(t - t_0) = N_{c, \text{old}} + f(t - t_0, \tau, l)(N_{c, \text{new}} - N_{c, \text{old}}) \quad (18)$$

355 where,

$$f(t - t_0, \tau, l) = \begin{cases} 0.0, & \text{if } t - t_0 \leq \tau \\ \frac{t - t_0}{l} - \frac{\tau}{l}, & \text{if } \tau < t - t_0 \leq \tau + l \\ 1.0, & \text{otherwise} \end{cases}$$

356 where  $\tau$  is the number of days before measures start having an effect and  $l$  is the number of  
357 additional days after the time delay until full compliance is reached. Both parameters are  
358 calibrated to the daily number of hospitalizations in Belgium (Section 2.4). The difference  
359  $t - t_0$  denotes the number of days since a change in social policy.

### 360 2.4 Parameter identification and model predictions

361 **Aim of the calibration procedure** To demonstrate the robustness of the social contact  
362 model and calibration method, for each of the 2020 COVID-19 waves, we calibrate the model  
363 to a minimal dataset and then increase the amount of data used in the calibration procedure  
364 to assess if the model can adequately predict future hospitalizations and to assess if the pos-  
365 terior distributions of the effectivity parameters ( $\Omega_x$ ) convergence. For the first COVID-19  
366 epidemic, we calibrate the model using data until April 4th, 2020, and then extend the data  
367 range used in the calibration in two-week increments until July 1st, 2020. During the sec-  
368 ond wave, we calibrate the model until November 7th, 2020, and then extend the calibration  
369 to the date of schools re-opening until November 16th, 2020, the date of schools closing for  
370 Christmas holidays on December 18th, 2020 and we finally calibrate until February 1st, 2021.  
371 By February 1st, 2021, the full impact of school closure and decrease in work mobility during  
372 the holiday period is visible in the new hospitalizations. Extending the calibration beyond  
373 February 1st, 2021 is out of scope for this study, as the emergence of more contagious strains  
374 (B.1.1.7) and the national vaccination campaign need to be included from this point onward  
375 (Table 2). As previously mentioned, the effectiveness of contacts in schools cannot be studied  
376 during the first COVID-19 wave because schools were only opened to a very limited extent  
377 before their final closure on July 1st, 2020.

378 **Parameters** The model parameters  $R_0$ ,  $l$ ,  $\tau$ ,  $\Omega_{\text{home}}$ ,  $\Omega_{\text{schools}}$ ,  $\Omega_{\text{work}}$ ,  $\Omega_{\text{rest}}$  and  $\zeta$  must be cali-  
379 brated to the available hospitalization data. From Equation 14, the basic reproduction num-  
380 ber depends on four model parameters,  $\beta$ ,  $\omega$ ,  $d_a$  and  $a_i$ . We calibrate  $\beta$  and  $d_a$  to hospitaliza-  
381 tion data.  $\omega$  is omitted from the calibration because an increase in  $\omega$  can be compensated

## 2.4 Parameter identification and model predictions 2 MATERIALS AND METHODS

382 by a decrease in  $d_a$ . The subclinical fraction  $a_i$  is omitted because it is an age-stratified pa-  
383 rameter consisting of nine values, which renders its calibration computationally unfeasible.  
384 The calibration of  $\beta$  and  $d_a$  should allow sufficient degrees of freedom to obtain a robust es-  
385 timate of the basic reproduction number without increasing the demand for computational  
386 resources too much. In total, nine parameters must be calibrated to hospitalization data.

387 **Data** The calibration procedure aims to obtain a parameter set that leads to a good agree-  
388 ment between the model predictions and the observed data. We calibrate all parameters  
389 except the seroreversion rate ( $\zeta$ ) to the time-series of daily new hospitalizations ( $H_{in}$ ), which  
390 are available for download at <https://epistat.sciensano.be/Data>. The serorever-  
391 sion rate is estimated using five serological measurements from Herzog et al. [39] and eight  
392 serological measurements from Sciensano, spanning a period from March 30th, 2020 until  
393 July 7th, 2020. For the sake of computational efficacy, the model is first calibrated to the first  
394 COVID-19 wave in Belgium, then, the model states on September 1st, 2020 are used as the  
395 initial condition to initiate the calibration of the second COVID-19 wave. In this way, the  
396 calibration procedure is split between the first COVID-19 wave from March 15th, 2020 until  
397 July 1st, 2020, and the second COVID-19 wave from September 1st, 2020 until February 1st,  
398 2021.

399 **Statistical model** Rather than using the method of least squares, we assume the data are in-  
400 dependent and identically distributed (i.d.d.) sequences of poisson variables. The resulting  
401 log-likelihood function is,

$$\log L(\mathbf{y} | \mathbf{x}, \boldsymbol{\theta}) = - \sum_{i=1}^N \left[ y_i(\boldsymbol{\theta}) - x_i \log(y_i(\boldsymbol{\theta})) \right], \quad (19)$$

402 where the vector of parameters,  $\boldsymbol{\theta}$ , that maximizes the log-likelihood function must be found.  
403 In Equation 19,  $\mathbf{y}$  denotes the model prediction,  $\mathbf{x}$  denotes the timeseries of data and  $N$   
404 represents the number of datapoints.

405 **Calibration procedure** The fitting procedure is performed in two steps. Maximising the  
406 result of Equation 19 is computationally demanding and suffers from the presence of local  
407 maxima. We thus need an efficient way to scan through the nine-dimensional parameter  
408 space  $\boldsymbol{\theta} = \{\beta, d_a, \dots, \Omega_{rest}, \zeta\}$ . A good technique to initially broadly identify the region where  
409 the global maximum is situated is *Particle Swarm Optimisation* (PSO) [45]. When a region of  
410 interest has been identified, we use the maximum-likelihood estimates as initial values for  
411 the ensemble sampler for Markov Chain Monte Carlo (MCMC) proposed by Goodman and  
412 Weare [16]. For all parameters, uniform prior distributions were used.



### 3 RESULTS

#### 2.5 Effects of non-pharmaceutical interventions

#### 2.5 Effects of non-pharmaceutical interventions

To better compare the effects of mobility changes on the daily number of new hospitalizations, we compute the relative share of contacts and the effective reproduction number ( $R_e$ ) at home, in schools, in workplaces and for the combination of leisure, public transport and other contacts. The number of effective contacts in the aforementioned places at time  $t$  are equal to,

$$N_{c, \text{home}}^*(t) = \Omega_{\text{home}} N_{c, \text{home}}, \quad (20)$$

$$N_{c, \text{schools}}^*(t) = \Omega_{\text{schools}} H_{\text{schools}}(t) N_{c, \text{schools}}, \quad (21)$$

$$N_{c, \text{work}}^*(t) = \Omega_{\text{work}} G_{\text{work}}(t) N_{c, \text{work}}, \quad (22)$$

$$N_{c, \text{rest}}^*(t) = \Omega_{\text{rest}} \left[ G_{\text{transit}}(t) N_{c, \text{transport}} + G_{\text{r \& r}}(t) N_{c, \text{leisure}} + G_{\text{g \& p}}(t) N_{c, \text{others}} \right], \quad (23)$$

where  $N_{c, \text{home}}^*$ ,  $N_{c, \text{schools}}^*$ ,  $N_{c, \text{work}}^*$ ,  $N_{c, \text{rest}}^*$  denote the number of effective contacts at home, in schools, at work or for the sum of leisure, public transport and other contacts. The relative share of contacts in location  $x$  and for age group  $i$  is computed as,

$$r_{x,i}(t) = \sum_{j=1}^N \left( \frac{N_{c,x}^*(t)}{N_{c, \text{home}}^*(t) + N_{c, \text{schools}}^*(t) + N_{c, \text{work}}^*(t) + N_{c, \text{rest}}^*(t)} \right), \quad (24)$$

The effective reproduction number for age group  $i$ , in place  $x$  and at time  $t$  is computed as,

$$R_{e,x,i}(t) = \frac{S_i(t)}{S_i(0)} (a_i d_a + \omega) \beta \sum_{j=1}^N N_{c,x,ij}^*(t), \quad (25)$$

Finally, the population average effective reproduction number in place  $x$ , and the population average relative share of contacts in location  $x$ , are computed as the weighted average over all age groups using the demographics listed in Table 1.

## 3 Results

### 3.1 Analysis of hospital surveillance data

The average time from symptom onset to hospitalization is 6.4 days (IQR 2.0 - 8.0 days). Of the 22 136 hospitalized patients, 3 624 patients (16.2 %) required intensive care at some point during their stay and 18 512 (83.8 %) remained in cohort. The overall mortality in the hospital is 21.4 %, the mortality in cohort was significantly lower than the mortality in ICU (16.6 % vs. 46.3 %,  $p < 0.001$ ). One patient under 20 years old has died from COVID-19, mortality is generally low for young patients and increases with older age (Figure 16 and Table 4 of the supplementary materials). The average length of the stay in a cohort ward was 11.0 days (IQR: 4.0 - 13.0 days) and the average length of an ICU stay was 13.6 days (IQR: 4.0 - 19.0 days) ( $p < 0.001$ ). The average cohort stay was 10.8 days (IQR: 4.0 - 12.0

437 days) if the patient had recovered and 11.8 days (IQR: 4.0 - 14.0 days) if the patient had died  
438 ( $p < 0.001$ ). The average ICU stay was 12.0 days (IQR: 3.0 - 15.0 days) if the patient had  
439 recovered and 15.2 days (IQR: 5.0 - 21.0 days) if the patient had died ( $p < 0.001$ ). Patients  
440 recovering from their ICU stay spend 11.2 additional days (IQR: 4.0 - 13.0 days) in cohort for  
441 a recovery and observation stay. Residence times in cohort are shorter than residence times  
442 in ICU. In both wards, deceased patients had longer stays than recovered patients (Figure  
443 15 and Table 5 of the supplementary materials). Residence times in cohort and ICU increase  
444 with the patient's age, the same goes for the length of a recovery stay after a stay in ICU. For  
445 example, a 20-30 year old patient is expected to spend 6.3 days (IQR: 2.0 - 7.0 days) in cohort  
446 while a 70-80 year old patient is expected to spend 12.6 days in cohort (IQR: 5.0 - 14.0 days)  
447 (Table 5).

### 448 3.2 Model calibration

449 The population average basic reproduction number was computed as  $R_0 = 4.16$  (IQR: 3.90  
450 - 4.39) for the first 2020 COVID-19 wave and as  $R_0 = 3.69$  (IQR: 3.64 - 3.75) for the second  
451 2020 COVID-19 wave. Large differences in the basic reproduction number exist between  
452 the different age groups (Figure 3). It is clear that the youths and working-aged popula-  
453 tion drive the SARS-CoV-2 pandemic while people of ages 70 or above can hardly sustain a  
454 SARS-CoV-2 pandemic amongst themselves, this is mainly because elderly individuals have  
455 limited social interactions (Figure 3). Still, these individuals make up roughly 35 % of all  
456 hospitalizations. The biggest risk group are the individuals aged 50 to 70, which make up  
457 roughly 50 % of the expected hospitalizations. The high expected fraction of hospitalizations  
458 in this age group is due to a trade-off between social contact and hospitalization risk. These  
459 individuals have plenty of social contact and at the same time, have a high propensity to  
460 hospitalization.

461  
462 Compliance to social measures was similar for both 2020 COVID-19 waves, with an average  
463 delay of 0.22 (IQR: 0.07-0.31) and 0.39 (IQR: 0.20 - 0.52) days, and a time to reach full compli-  
464 ance to measures of 9.17 (IQR: 8.89 - 9.50) and 6.94 (IQR: 6.71 - 7.18) days respectively. Using  
465 the serological datasets by Herzog et al. [39] and Sciensano, the average time to serorever-  
466 sion ( $1/\zeta$ ) was estimated as 9.2 months (IQR: 7.2 - 12.1 months) (Figure 13). The model was  
467 calibrated to the new hospitalizations and serological data, however, to obtain estimates for  
468 the total number of patients in Belgian hospitals and the number of deceased patients in  
469 Belgian hospitals, the hospitalization parameters computed using the clinical surveillance  
470 dataset are propagated in the model using bootstrap sampling. In supplementary figures 5  
471 and 6, the ability of the calibrated model to predict the number of daily hospitalizations, the  
472 total number of patients in Belgian hospitals, the total number of deaths in Belgian hospi-  
473 tals, and the seroprevalence in the Belgian population during both 2020 COVID-19 waves

### 3 RESULTS

#### 3.2 Model calibration

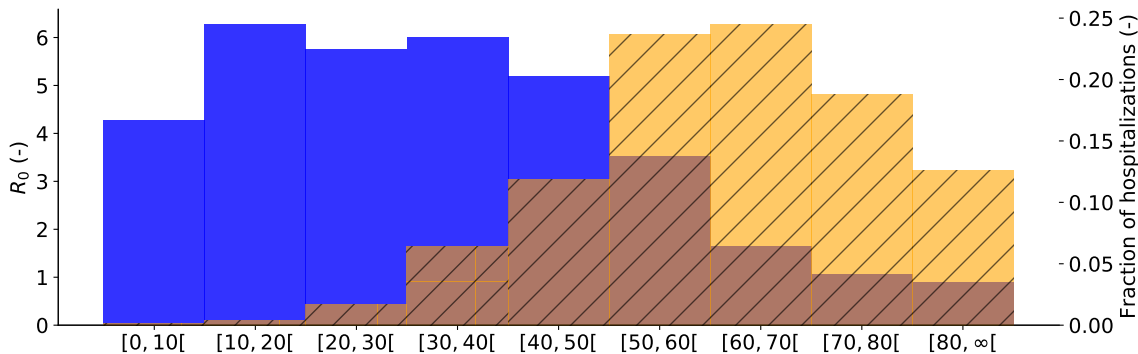

**Figure 3:** Basic reproduction number per age group ( $R_{0,i}$ ), for Belgium (blue). Expected fraction of the total Belgian hospitalizations during the first COVID-19 wave, as predicted by the model, from March 15th, 2020 until July 1st, 2020 in age group  $i$  (orange, striped). Youths and working-aged population drive the pandemic, while the senior population is mostly in need of hospital care.

474 are demonstrated. The model's ability to predict the number of hospital deaths in every age  
475 strata is demonstrated in Figure ??.

476

477 Figure 5 summarizes the results of six model calibrations using hospitalization datasets start-  
478 ing on March 15th, 2020 until April 4th, 2020, and subsequently increased in two-week incre-  
479 ments. Here, Figure 5 (a) represents the minimal dataset, where the data range used for the  
480 calibration was equal to March 15th, 2020 until April 4th, 2020. Opposed is Figure 5f, which  
481 uses the maximal dataset, using hospitalization data from March 15th, 2020 until July 1st,  
482 2020. Using the minimal dataset (Figure 5a), the posterior distributions are uninformative  
483 and model prediction uncertainty is large. Using additional data from April 15th, 2020 (Fig-  
484 ure 5b) onwards, the model captures the observed downward trend in the hospitalization  
485 data. Before the release of social restrictions on May 4th, 2020 (Figure 5a-5c), the poste-  
486 rior distributions seem to converge to distributions different from the ones found using the  
487 maximal dataset (Figure 5f). However, during the gradual lifting of lockdown restrictions  
488 (Figure 5d-5f), the posterior distributions monotonically converge to their final distributions.

489

490 Similarly, four calibrations on hospitalization datasets of increasing length during the second  
491 COVID-19 wave were performed and the results are summarized in Figure 6. Once more,  
492 the minimal dataset (Figure 6a), which uses data from September 1st, 2020 until November  
493 7th, 2020 does not result in informative posterior distributions of the effectivity parameters.  
494 Uncertainty on the model prediction is large, but the mean model prediction is fairly ac-  
495 curate. As soon as schools are opened on November 16th, 2020, the daily hospitalizations  
496 evolve to a plateau. Despite large uncertainty on the model prediction, the emergence of the

497 hospitalization plateau is captured in the uncertainty band, and the model thus provides a  
498 starting estimate using the minimal dataset. Although model accuracy has risen, a similar  
499 conclusion can be drawn for the calibration using data until schools re-opening on Novem-  
500 ber 16th, 2020. When including data in the hospitalization dataset until schools closure for  
501 the Christmas holidays on December 18th, 2020 (Figure 6c), the model correctly attributes  
502 the increased transmission to the opening of schools. In Figure 6c, it can be seen that the  
503 effectivity parameter for schools is almost equal to the maximum value of one. Although the  
504 posteriors of the effectivity parameters still differ significantly from their final distributions,  
505 the model provides an accurate prediction for the future evolution of the new hospitaliza-  
506 tions during the Christmas holidays and until schools re-opening on January 4th, 2021. From  
507 the inference using the maximal dataset (Figure 6d), it is clear that the model attributes high  
508 effectivities for contacts at home and in schools.

### 509 **3.3 Effects of non-pharmaceutical interventions**

510 To better compare the effects of non-pharmaceutical interventions between both 2020 COVID-  
511 19 waves, we computed the relative share of contacts and the effective reproduction number  
512 at home, in schools, in workplaces, and for the sum of leisure, public transport, and other  
513 contacts (Figure 7). In this way, we can dissect the force of infection in our model, allowing  
514 us to assess the relative impact of contacts made at different locations on SARS-CoV-2 trans-  
515 mission. In pre-pandemic times, leisure and work contacts account for the bulk of total con-  
516 tacts, while under strict lockdown measures (March 15th, 2020 - May 4th, 2020 and October  
517 19th, 2020 - November 16th, 2020), the contacts at home are the main driver of SARS-CoV-2  
518 spread. The effective reproduction number under strict lockdown measures was equal to  
519  $R_e = 0.67$  (IQR: 0.48 - 0.76) for the first COVID-19 epidemic and was equal to  $R_e = 0.66$   
520 (IQR: 0.61 - 0.69) for the second COVID-19 epidemic. Aside from the interactions at home,  
521 leisure contacts had the second most impact during the first COVID-19 wave, with roughly  
522 twice the impact of work contacts. When lifting social restrictions from May 4th, 2020 on-  
523 wards, the relative contribution of home contacts gradually declines, while the contributions  
524 of work and leisure become more important. The effective reproduction number gradually  
525 increases and approaches the critical value of  $R_e = 1$  by the beginning of summer (average  
526 of June, 2020  $R_e = 0.91$ , IQR: 0.77 - 1.00).

527

528 As soon as schools are re-opened on November 16th, 2020, a plateau in the daily number  
529 of hospitalizations emerges (Figure 7). There were no other major policy changes around  
530 this time, except schools re-opening. Our model deduces this correlation by inferring pos-  
531 terior values of the effectivity of contacts in schools close to one, meaning school contacts  
532 were highly effective for SARS-CoV-2 transmission. Schools have an impact similar to the  
533 home interactions, with both contributing roughly 40 % to the total number of effective con-

### 3 RESULTS

#### 3.3 Effects of non-pharmaceutical interventions

534 facts during the second COVID-19 wave. The opening of schools under lockdown can tip  
535 the scale, and push the effective reproduction number just above the critical value of  $R_e = 1$ .  
536 When schools are opened, the effective reproduction number increases from  $R_e = 0.66 \pm 0.04$   
537 to  $R_e = 1.09 \pm 0.05$ , causing a stagnation of the daily hospitalizations. To further validate this  
538 result, we extracted the number of laboratory-confirmed cases in youths  $[0, 20[$ , the working  
539 population  $[20, 60[$  and the senior population  $[60, \infty[$  from the *Belgian Scientific Institute of*  
540 *Public Health* (Sciensano). The time-series were normalized with the number of cases on  
541 November 21st, 2020<sup>1</sup> to allow a better comparison. The number of laboratory-confirmed  
542 cases amongst youths starts increasing as soon as schools are opened on November 16th,  
543 2020 (Figure 4). A similar pattern is observed during school closure and re-opening for the  
544 Christmas holidays, although it should be noted the relationship is less clear. This is most  
545 likely the effect of Christmas and New Year celebrations and returning travelers. The use  
546 of a time-lagged cross-correlation revealed a significant lead-relationship between the num-  
547 ber of cases in youths and the working population by 9 days, and a leading relationship  
548 between the number of cases amongst youths and the senior population by 13 days (Section  
549 A.5). This indicates that as schools are reopened, SARS-CoV-2 finds its way through social  
550 networks from younger to older individuals, eventually pushing the effective reproduction  
551 number above one.

552

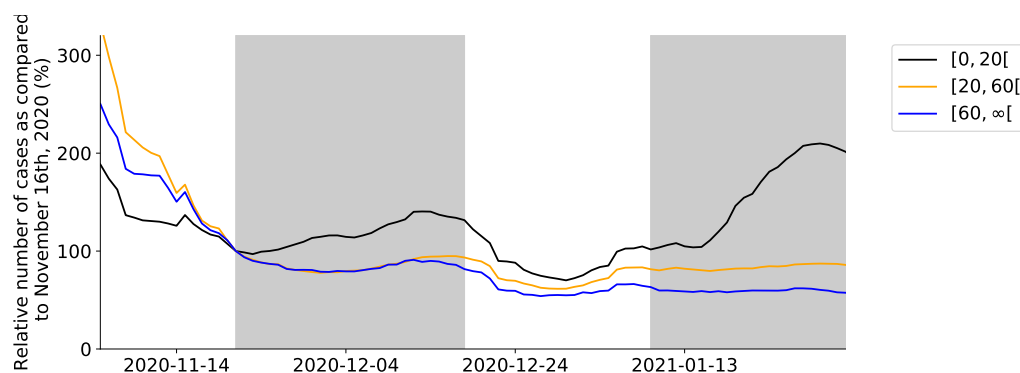

**Figure 4:** Relative number of confirmed cases in youths, the working population and the senior population during the period November 2nd, 2020 until February 1st, 2021, as compared to the number of confirmed cases in each group on November 16th, 2020. The grey shade is used to indicate schools were open.

<sup>1</sup>Date of school reopening 2021-11-16 plus one five-day incubation period.

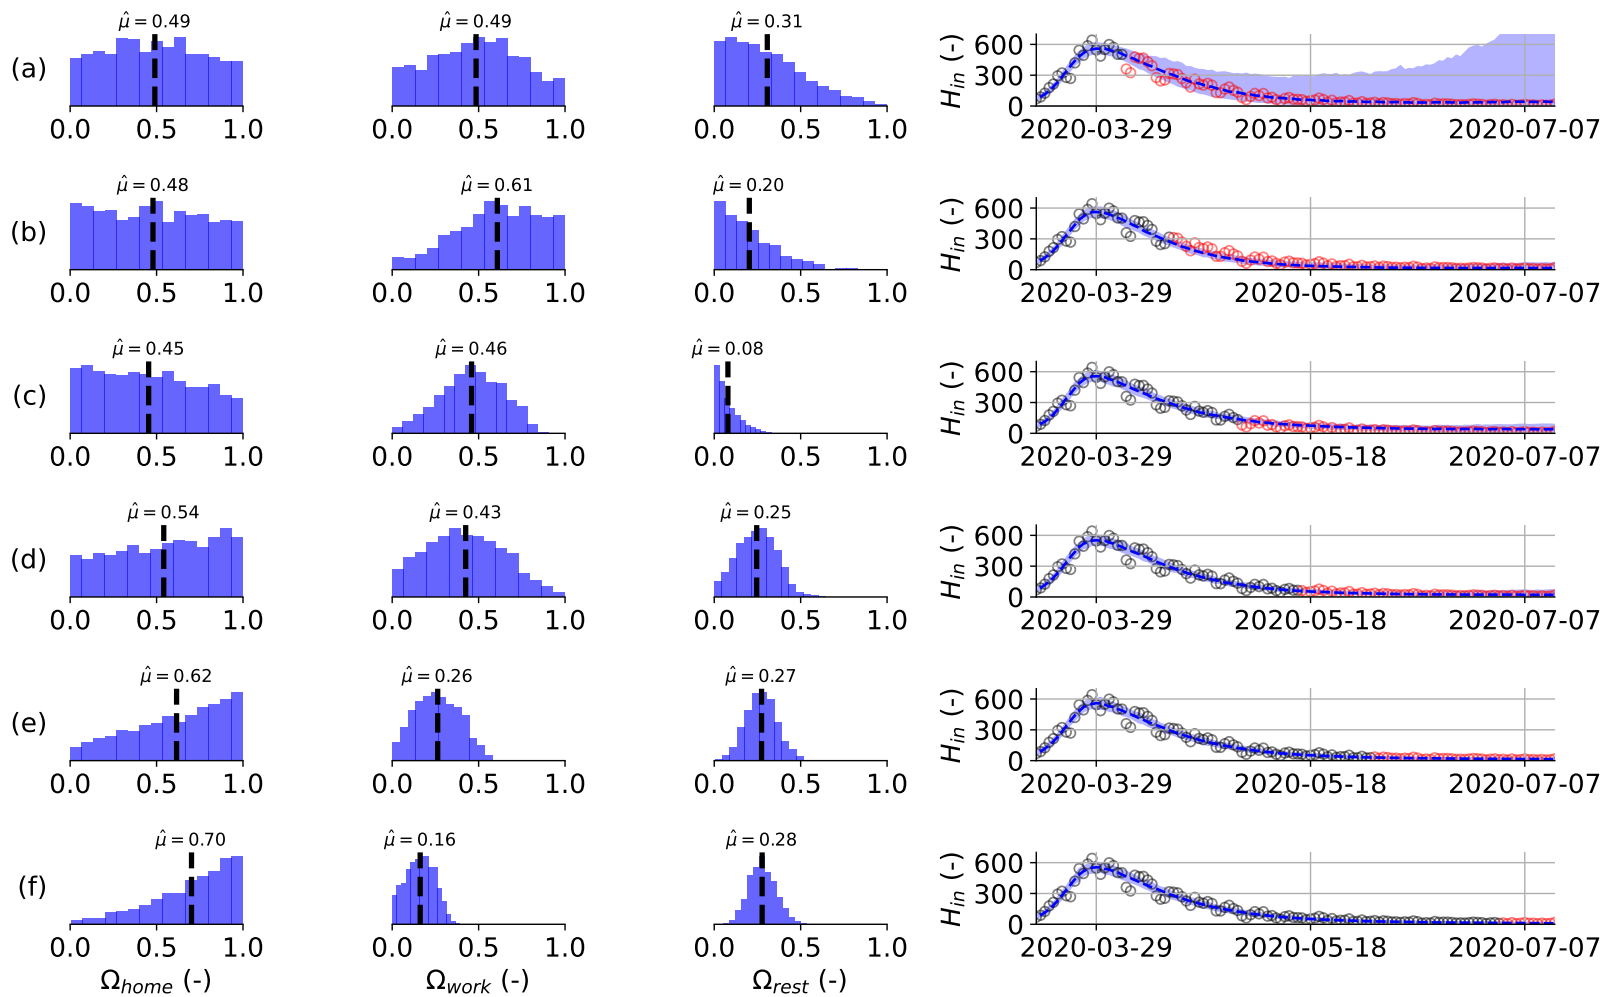

**Figure 5:** (left) Estimated posterior distributions for the effectivity of a contact at home ( $\Omega_{home}$ ), in the workplace ( $\Omega_{work}$ ) and for the sum of leisure activities, other activities and public transport ( $\Omega_{rest}$ ), (right) together with the resulting model prediction for the daily hospitalizations from March 15th, 2020 until July 14th, 2020 (right). The effectivity of school contacts could not be deduced during the first 2020 COVID-19 wave because schools were only re-opened very limited before their final closure on July 1st, 2020. Calibration performed using the daily hospitalizations in Belgium until: (a) 2020-04-04, (b) 2020-04-15, (c) 2020-05-01, (d) 2020-05-01, (e) 2020-06-01 and (f) 2020-07-01. Calibration data in black, validation data in red. Model predictions are accurate in all but the minimal calibration dataset (a). Monotonic convergence of the effectivity parameter posteriors is reached quickly after lockdown release on May 4th, 2020 (d-f).

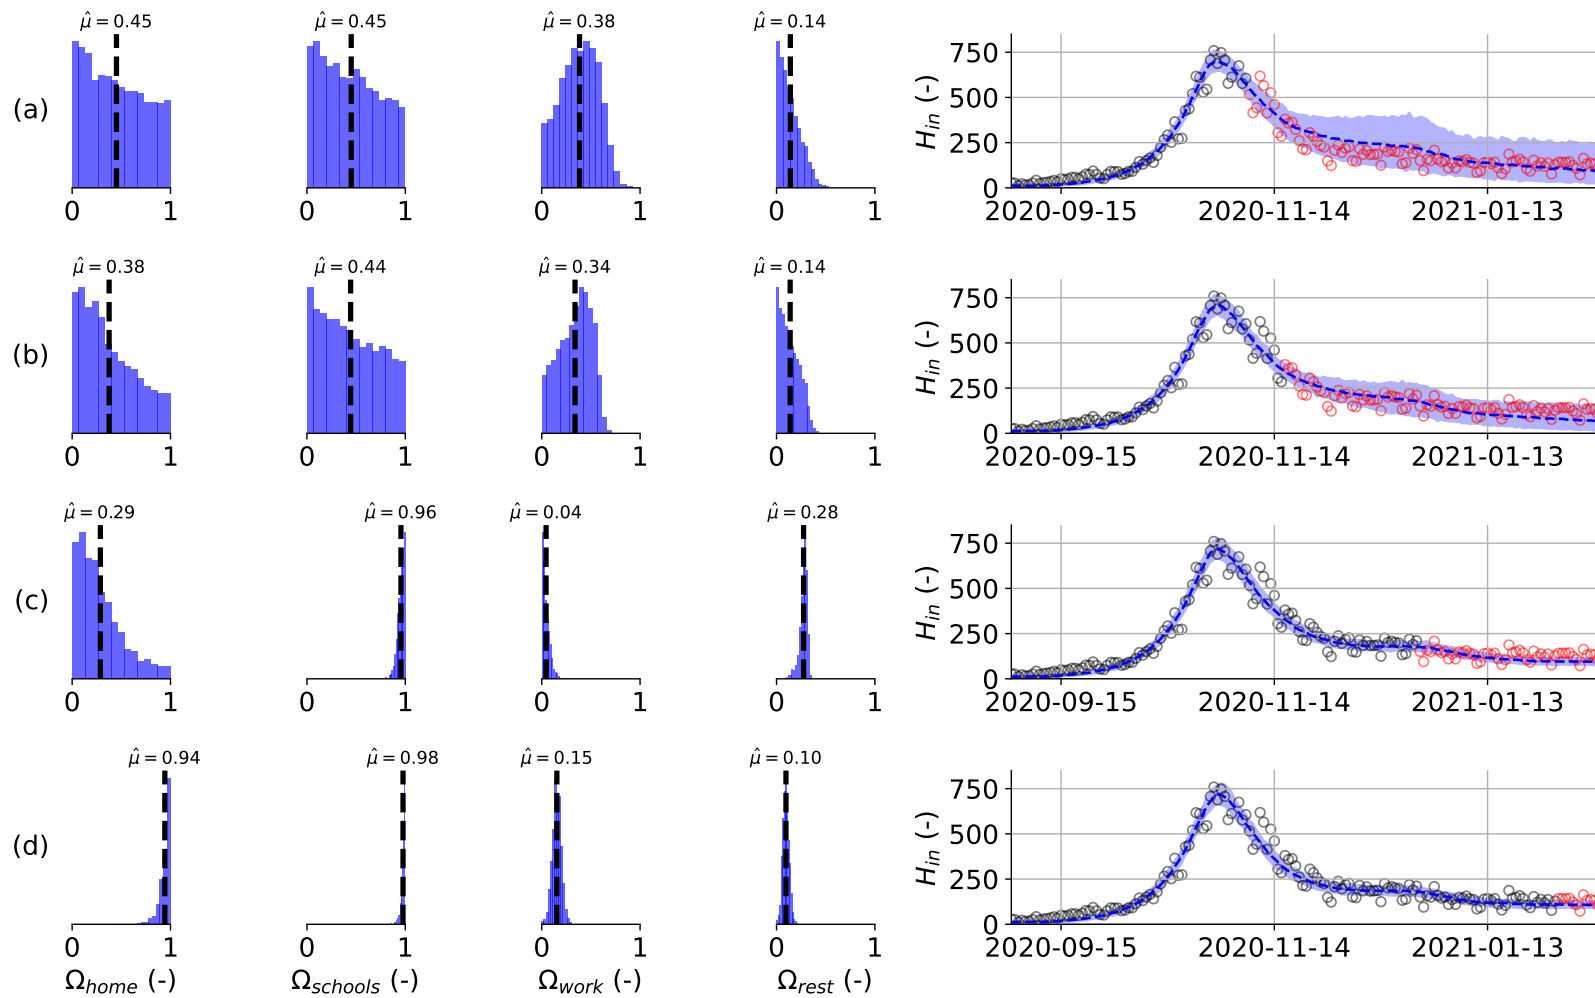

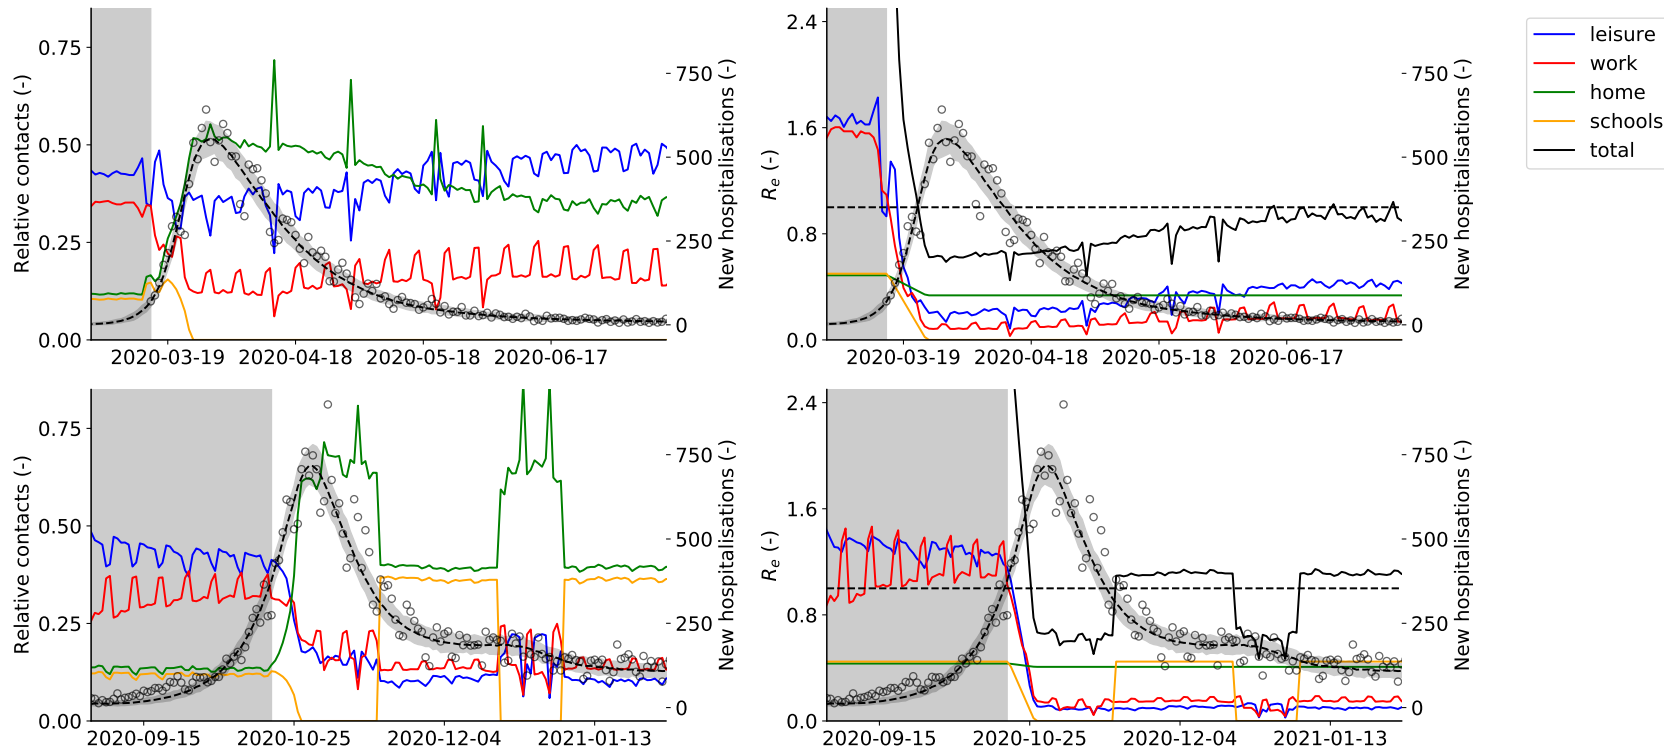

**Figure 7:** (First column) Relative share of contacts at home, in the workplace, in schools and for the sum of leisure activities, (Second column) effective reproduction number ( $R_e$ ) at home, in the workplace, in schools and for the sum of leisure activities, other activities and public transport. The right axis denotes the predicted number of daily Belgian hospitalizations. The first row depicts the first COVID-19 wave in Belgium, from March 15th, 2020 until July 14th, 2020, while the second row depicts the second COVID-19 wave in Belgium, from September 1st, 2020 until February 1st, 2021. Mean and 95 % confidence interval of 1000 model realisations. The background is shaded grey before lockdown measures were taken. During both lockdowns, home interactions have the largest share of effective contacts. During lockdown release, the relative importance of work and leisure contacts start increasing. Schools opening and closing has a large impact on the effective reproduction number, and can end a decreasing trend in hospitalizations.



## 4 DISCUSSION

---

### 553 4 Discussion

#### 554 4.1 Analysis of hospital surveillance data

555 We computed hospitalization parameters using data from 22 136 patients in Belgian hospi-  
556 tals. The average time from symptom onset to hospitalization was estimated as 6.4 days.  
557 This estimate is in line with the previous estimate for Belgium of 5.7 days by Faes et al. [41],  
558 and is in line with estimates for other regions such as 5-9 days for China [38], 4.4 days for  
559 Hong Kong, and 5.1 days for the UK [46], especially when the interquartile range of 2.0 - 8.0  
560 days is taken into account. Of the 22 136 hospitalized patients, 3 624 patients (16.2 %) re-  
561 quired intensive care at some point during their stay and 18 512 (83.8 %) remained in cohort.  
562 The result is slightly lower than the estimate of Wu and McGoogan [47] for China, who esti-  
563 mated that one-quarter of all hospitalized patients require intensive care. It should however  
564 be noted that the criteria for ICU admission and release might differ between countries. The  
565 ICU admission probabilities and mortalities in cohort and ICU indicate that COVID-19 has a  
566 much higher severity in older individuals, which is in line with estimates from other studies  
567 [4, 48]. In terms of hospital residence times, our estimates agree well with those made by  
568 Faes and colleagues [41]. The average time spent in cohort was estimated as 11.0 days (3.4  
569 - 15.6 days for the youngest versus oldest age groups), while the average time spent in ICU  
570 was estimated as 13.6 days (6.0 - 10.8 days for the youngest versus oldest age groups). The  
571 average time spent in ICU was lower in the 80+ age group (10.8 days) than in the 70-80-  
572 year-olds (15.0 days). The residence time estimates are in line with Vekaria et al. [49] who  
573 estimated a length of stay in England for COVID-19 patients not admitted to ICU of 8.4 days  
574 and for ICU length of stay of 12.4 days. It was previously reported by Faes et al. [41] that the  
575 median residence time decreased after the first 2020 COVID-19 wave, however, we chose not  
576 to account for temporal changes in the hospital residence times and mortalities. The model  
577 predicted total number of patients and number of deaths in Belgian hospitals (Figures 9 and  
578 10) would likely benefit from propagating time-dependent hospitalization parameters in the  
579 model. Vandromme et al. [50] previously found that the average hospital residence times  
580 in Belgium have decreased between the first and second 2020 COVID-19 waves, which is  
581 mainly due to standardization of COVID-19 hospital treatment. In spite, the model predic-  
582 tions are sufficiently accurate to aid policymakers in the decision-making process.

583

#### 584 4.2 Model calibration

585 We obtained an average basic reproduction number of  $R_0 = 4.16$  (IQR: 3.90 - 4.39) for the  
586 first 2020 COVID-19 wave and of  $R_0 = 3.69$  (IQR: 3.64 - 3.75) for the second 2020 COVID-  
587 19 wave, which is in line with the global consensus range of  $R_0 = [2, 4]$ . The estimate for  
588 the second COVID-19 wave is slightly lower, and this is most likely because this estimate

589 implicitly includes the effects of preventive measures and mentality changes that were grad-  
590 ually adopted during the first 2020 COVID-19 wave. The compliance to social measures  
591 was similar between both 2020 COVID-19 waves, little lag was observed (0.22 vs. 0.39 days)  
592 and the time to reach full compliance was of the same magnitude (9.17 vs 6.94 days). Thus,  
593 compliance to lockdown restrictions can be modeled using a ramp function without lag,  
594 eliminating one of the model's parameters, namely  $\tau$  (Equation 18). The seroreversion rate  
595 was estimated using two serological datasets. The data by Herzog et al. [39] consists of  
596 residual blood samples sent to laboratories, while the dataset of Sciensano consists of blood  
597 samples from Red Cross blood donors. The dataset of Herzog et al. [39] is likely biased to-  
598 wards sick individuals, while the dataset of Sciensano is biased towards healthy individuals.  
599 In the calibration procedure, both datasets were given equal weights to incorporate a *truth*  
600 *in the middle* heuristic. We estimated the average time to seroreversion as 9.2 months (IQR:  
601 7.2 - 12.1 months), although the estimated distribution (Figure 13) has a long tail, it is very  
602 likely that antibody immunity gradually wanes. The estimate is consistent with the finding  
603 that 50 % of antibodies are most likely lost one year after the infection [24]. Using the same  
604 dataset, Abrams and colleagues [11] have estimated the rate of antibody waning at 8 months  
605 using their SARS-CoV-2 model (informal communication). It should be noted that the in-  
606 corporation of antibody waning completely ignores the effects of cellular immunity and that  
607 more research on the exact kinetics of the immune response is necessary. In spite, it is best  
608 to include waning immunity in SARS-CoV-2 models, especially when long time-horizons  
609 are considered in the simulations. In this study, a population average subclinical fraction of  
610 57 % was used, which was higher than estimated in a systematic review by Buitrago-Garcia  
611 et al. [36] (31 %) and higher than the estimate for the Icelandic population of Gudbjartsson  
612 et al. [35] (43 %). We expect that a decrease in the subclinical fraction could be compensated  
613 by a decrease of the per-case hospitalization risk ( $h$ ) to obtain the same fit to the hospital-  
614 ization data. However, lowering the subclinical fraction would lead to a reduced fraction of  
615 seropositive individuals in the population and thus a mismatch between the simulated sero-  
616 prevalence data and observed seroprevalence data. Because of the good agreement between  
617 the simulated and observed seroprevalence, the fraction of subclinical infections are most  
618 likely correctly represented in the model (Figures 9 and 10).

619

620 We calibrated the model's effectivity parameters ( $\Omega_{\text{home}}$ ,  $\Omega_{\text{schools}}$ ,  $\Omega_{\text{work}}$ ,  $\Omega_{\text{rest}}$ ) on incremen-  
621 tally larger hospitalization datasets and found that the model provides accurate forecasts  
622 under the observed mobility changes, even when the posteriors still depend on the extent  
623 of the dataset. However, *correct*<sup>2</sup> effectivity parameters could only be deduced a posteriori  
624 events. This is because *information* on the effectiveness of contacts can only be obtained by  
625 observing the hospitalizations under changing policies. Examples are the effects of leisure  
626 and work relaxations during the first COVID-19 wave and the effect of schools re-opening

<sup>2</sup>Assuming the inferred posterior distributions of the maximal dataset are correct.

## 4 DISCUSSION

### 4.3 Effects of non-pharmaceutical interventions

627 during the second COVID-19 wave. From April 15th, 2020 onwards (Figure 5, panel b) the  
628 ever decreasing trend in the daily hospitalizations is nicely captured even with posteriors  
629 seemingly converging to distributions different than those of the maximal dataset (panel f).  
630 Still, on May 1st 2020 (panel c), the model could have been used to accurately inform poli-  
631 cymakers on the effects of lifting work and leisure restrictions just four days later. As soon  
632 as restrictions are lifted, the posteriors quickly converge to their final distributions. A similar  
633 observation is made with regard to the schools effectivity parameter. From November 7th,  
634 2020 onwards (Figure 6, panel a) the effect of schools re-opening is captured in the model  
635 uncertainty, in spite of deviant posterior distributions. From December 18th, 2020 onwards  
636 (panel c) the effect of schools re-opening is captured both in the model predictions and the  
637 effectivity parameters. Because accurate posteriors can only be inferred a posteriori, the  
638 modeler must assess if policy changes have been sufficient to deduce meaningful effectivity  
639 posteriors. This is important when performing scenario analysis, as incomplete knowledge  
640 of the effectivity posterior can significantly alter the results.

641

642 Scaling pre-pandemic contact matrices with public mobility data has proven to be a rapidly  
643 deployable and cheap alternative to the use of survey-based contact studies under lockdown  
644 measures, such as the one of Coletti et al. [17] for Belgium. The social contact model is well-  
645 fit for the acute stages of the pandemic when these contact data are still being gathered.  
646 However, as the pandemic progresses, the survey-based contact studies are the preferred  
647 choice as the use of public mobility data is more coarse-grained. Because the GCMRs are not  
648 available for different age groups, they do not allow us to accurately capture how individ-  
649 uals of different ages have altered their behavior under lockdown measures. For example,  
650 the contact study by Coletti et al. [17] shows that younger individuals tend to increase their  
651 contacts sooner than older individuals after the release of lockdown measures. These dif-  
652 ferential effects are still captured in our social contact model, albeit less accurate than the  
653 survey-based contact model, by the multiplication of the GCMRs with the pre-pandemic  
654 number of contacts. For example, the mobility reduction in workplaces is only applied to  
655 the matrix of work contacts, which only contains contacts for individuals between 20 and  
656 60 years old. Further, because the GCMRs are collated smartphone data, one could expect  
657 the elderly population to be underrepresented due to lower smartphone usage. However,  
658 it is unlikely that this would drastically alter our study's results because older individuals  
659 have fewer contacts than younger individuals and thus contribute less to overall SARS-CoV-  
660 2 spread.

661

### 662 4.3 Effects of non-pharmaceutical interventions

663 Finally, we would like to discuss the importance of schools in the SARS-CoV-2 pandemic. As  
664 previously mentioned in section 3.3, there seems to be a strong correlation between school  
665 re-opening, the rise of laboratory-confirmed cases amongst youths, the rise of the number  
666 of clusters in schools, and the emergence of plateaus in the daily hospitalizations (Figures 4  
667 and 7). Our model incorporates this correlation as high effectivities of school contacts. An  
668 increase in the effective reproduction number, from  $R_e = 0.66 \pm 0.04$  to  $R_e = 1.09 \pm 0.05$ ,  
669 is observed when schools are re-opened. Several studies have found children to be less  
670 susceptible to a SARS-CoV-2 infection [3, 26, 51]. Because quantitative data was scarce at the  
671 time of writing, we incorporated no changes in susceptibility and infectiousness in children  
672 in this study. However, this will not alter the large impact schools seem to have on SARS-  
673 CoV-2 spread in our model. If the susceptibility and infectiousness in children is lowered,  
674 this will most likely be countered during the parameter inference, where we expect higher  
675 values for the effectivity of contacts of children in schools ( $\Omega_{\text{schools}}$ ) to be inferred. Although  
676 the present evidence is circumstantial, and correlation does not imply causation, schools  
677 seem to play a critical role in SARS-CoV-2 spread. Thus, school closure seems an effective  
678 way of countering an epidemic SARS-CoV-2 trend.

## 679 5 Conclusions

680 We obtained an average basic reproduction number of  $R_0 = 4.16$  (IQR: 3.90 - 4.39) and  
681  $R_0 = 3.69$  (IQR: 3.64 - 3.75) for both 2020 COVID-19 waves in Belgium. We found that SARS-  
682 CoV-2 strongly discriminates between individuals of different age groups, with youths and  
683 the working-aged population driving the pandemic, and the senior population needing  
684 hospital care. These results are in line with the established consensuses and highlight the  
685 model's validity. Further, by propagating the hospitalization parameters computed using  
686 the clinical surveillance dataset, the model is able to accurately predict the number of daily  
687 hospitalizations, the total number of patients in Belgian hospitals, the total number of deaths  
688 in Belgian hospitals, and the seroprevalence in the Belgian population during both 2020  
689 COVID-19 waves.

690  
691 The combination of the deterministic epidemiological model, which incorporates a-priori  
692 knowledge on disease dynamics, and the social contact model whose infectivity parameters  
693 were inferred allow us to make the most out of the available pre-pandemic data and public  
694 mobility data. Our method is computationally cheap and does not require ad-hoc tweaking  
695 to obtain a good fit to the observed data. A disadvantage is that the effectivity parameter dis-  
696 tributions only converge to their *correct* posterior distributions a posteriori policy changes.  
697 Still, even when using a very limited calibration dataset, the model is able to make accurate

## 6 FUTURE RESEARCH

---

698 predictions of the future number of hospitalizations, highlighting the robustness of the cali-  
699 bration method.

700

701 As soon as schools were re-opened on November 16th, 2020, the number of confirmed cases  
702 amongst youths starts increasing. A significant lead relationship between the number of  
703 cases amongst youths and the working population, and youths and the senior population  
704 was found. Our model incorporates this correlation as high effectivities of school contacts.  
705 When schools were re-opened under lockdown policies, the model indicates the effective  
706 reproduction number increased from  $R_e = 0.66 \pm 0.04$  to  $R_e = 1.09 \pm 0.05$ . Thus, school  
707 closure is an effective measure to counter an epidemic SARS-CoV-2 trend.

## 708 6 Future research

- 709 • The calibration procedure should be repeated using pandemic social contact matrices,  
710 which are currently being gathered for Belgium by Coletti et al. [17]. Further, the ef-  
711 fects of integrating the contacts with their duration should be explored. A comparison  
712 between the different results can then be made.
- 713 • The effective reproduction number in the different places should be compared to data  
714 on SARS-CoV-2 clusters to further validate the model.
- 715 • It is expected that lockdown measures in Belgium will be lifted soon. The impact of re-  
716 leasing measures on the daily hospitalizations should be studied to find a link between  
717 the effectivity parameters and the mobility reductions.
- 718 • If schools are a major contributor to SARS-CoV-2 spread, administering a vaccine with  
719 high transmission-blocking potential to youths is expected to have a similar effect as  
720 schools closure. Due to their localized nature, vaccination for SARS-CoV-2 in schools  
721 is logistically easier than vaccinating the general population.

## 722 Acknowledgements

723 This work is the result of a team effort. I want to thank Daniel Illana, Bram De Jaegher, Daan  
724 Van Hauwermeiren, Stijn Van Hoey and Joris Van den Bossche for their help in maintaining  
725 the GitHub repo, coding the visualizations and for teaching me the basics of object-oriented  
726 programming in Python. I would like to thank Mieke Descheppere, from the Ghent Uni-  
727 versity hospital and Wim Verbeke, MD from AZ Delta Roeselare, for sharing their insights  
728 on hospital dynamics. We thank VZW 100 km Dodentocht Kadee for their financial support  
729 through the organisation of the 2020 100 km COVID-Challenge.

## 730 **Competing interests**

731 The authors have no competing interests to declare.

## 732 **Role of the funding source**

733 This work was supported by the UGent *Special Research Fund*, by the *Research Foundation*  
734 *Flanders* (FWO), project number G0G2920N and by VZW *100 km Dodentocht Kadee* through  
735 the organisation of the 2020 100 km COVID-Challenge. Further, the computational resources  
736 and services used in this work were also provided by the VSC (*Flemish Supercomputer Center*),  
737 funded by FWO and the Flemish Government. The funding sources played no role in study  
738 design; in the collection, analysis and interpretation of data; in the writing of the report; and  
739 in the decision to submit the article for publication.

## 740 **Ethics statement**

741 Permission for the clinical hospital surveillance was granted by the Committee on Medical  
742 Ethics of the Ghent University Hospital (BC-07507) and by the Belgian Federal Information  
743 Security Committee to the Belgian Collaborative Group on COVID-19 Hospital Surveillance.  
744 The need for informed consent was renounced, however, upon hospital discharge, patients  
745 were informed that their data would be curated by the Belgian Scientific Institute for Public  
746 Health (Sciensano) and used in the context of the COVID-19 public health crisis for policy-  
747 supporting research.

## 748 **CRedit author statement**

749 **Tijs W. Alleman:** Conceptualization, Software, Methodology, Investigation, Data Curation,  
750 Writing - Original Draft. **Jenna Vergeynst:** Conceptualization, Software, Writing - Review  
751 & Editing, Project administration. **Lander De Visscher:** Methodology. **Michiel Rollier:**  
752 Methodology, Writing - Review. **Elena Torfs:** Conceptualization, Funding acquisition. **In-**  
753 **gmar Nopens:** Conceptualization, Funding acquisition, Project administration, Writing -  
754 Review. & Editing **Jan Baetens:** Conceptualization, Funding acquisition, Project adminis-  
755 tration, Writing - Review & Editing. **Belgian Collaborative Group on COVID-19 Hospital**  
756 **Surveillance** Data collection, Data Curation.

## A SUPPLEMENTARY MATERIALS

---

### 757 A Supplementary materials

#### 758 A.1 Overview of model assumptions and limitations

759 The following assumptions were made concerning the SEIQRD dynamics:

- 760 1. All individuals experience a brief presymptomatic, infectious period.
- 761 2. All individuals, including children, are equally susceptible to SARS-CoV-2 infection.  
762 It is unlikely that lower susceptibility in children would alter the dominant role of  
763 schools in SARS-CoV-2 transmission. During model calibration, a higher effectivity  
764 of the contacts in schools ( $\Omega_{\text{schools}}$ ) could compensate for the lower susceptibility in  
765 children.
- 766 3. Asymptomatic and mild cases automatically lead to recovery and in no case to death.
- 767 4. Mildly infected and hospitalized individuals cannot infect susceptibles (= *quarantined*).  
768 A fraction of individuals experiencing influenza-like illness will not reduce their num-  
769 ber of non-household contacts and will thus contribute to disease spread [52]. In our  
770 model, this behavior is not accounted for. The model cannot be used to model the  
771 effect of transmission to healthcare workers.
- 772 5. All deaths come from hospitals, meaning no patients died at home [53].
- 773 6. The modeled population is the general population of Belgium and does not explicitly  
774 take nursing homes into account. The model is unfit to make predictions on nursing  
775 home deaths.
- 776 7. Waning of antibody immunity is incorporated in the model as individuals transition-  
777 ing from the recovered (R) population pool to the susceptible (S) population pool. The  
778 incorporation of antibody waning ignores the effects of cellular immunity (through T-  
779 and B-cells). More research on the exact kinetics of the immune response is necessary  
780 to finetune to the model.

781 The following assumptions to the hospital dynamics were made:

- 782 1. Upon arrival in the hospital, all patients immediately transfer to a cohort ward or an  
783 ICU. In real life, a patient may first spend some time in a cohort ward before going to  
784 an ICU and this is not accounted for.
- 785 2. Residence times in cohort and in ICU differ depending on the outcome of the infection  
786 (recovered or deceased).
- 787 3. All recovered ICU patients spend some additional time in cohort (recovery and obser-  
788 vation stay).

789 4. Patients in nursing homes were excluded from the analysis of the clinical surveillance  
790 dataset. The model can make predictions on hospital deaths in individuals coming  
791 from the general population.

792 5. During the analysis of the hospital surveillance data, the data analysis was not split  
793 into several time intervals and hence the temporal changes in hospital residence times  
794 and mortalities were neglected. In spite, Faes et al. [41] have reported that the median  
795 residence time decreased after the first 2020 COVID-19 wave.

796 The following assumptions were made in the social contact model:

797 1. Prepandemic contact matrices by Willem et al. [14] are scaled with mobility reductions  
798 extracted from the GCMRs and an effectivity parameter inferred from hospitalization  
799 data using a *Markov-Chain Monte-Carlo* method to mimic pandemic social behavior.

800 2. The GCMRs are not age-stratified and do not correct for a potential underrepresenta-  
801 tion of older individuals in the data collection. The GCMRs are a more coarse-grained  
802 approach as compared to social-epidemiological contact studies that estimate mixing  
803 patterns under lockdown measures [17]. However, setting up a survey-based contact  
804 study is a resource and time-intensive endeavor. The advantage of using the GCMRs in  
805 our social contact model is their rapid and public availability, making their use appro-  
806 priate during the early stages of a pandemic when more accurate survey-based contact  
807 studies are being set up.

808 3. The effectivity of the contacts ( $\Omega_x$ ) are bound between zero and one. This implies that  
809 if work mobility is reduced to 40 % of its pre-pandemic value, the work contacts can  
810 account for no more than 40 % of its pre-pandemic value.

811 4. There is no link between the effectivity parameters and the mobility reduction. How-  
812 ever, when relaxing measures, an increase in mobility will likely be accompanied by an  
813 increase in the effectiveness of school contacts. This is due to mentality changes upon  
814 relaxation, as measures will gradually be ignored more.

815 **A.2 Overview of model parameters**



Table 1: Overview of simulation parameters used in the extended SEIQRD metapopulation model.

| Symbol               | Parameter                                                                                                                                                                       | Value                                                                                | Unit               | Reference                      |
|----------------------|---------------------------------------------------------------------------------------------------------------------------------------------------------------------------------|--------------------------------------------------------------------------------------|--------------------|--------------------------------|
| $a$                  | subclinical fraction per age group                                                                                                                                              | [0.98 0.98 0.88 0.69 0.59 0.39 0.13 0.07 0.01]<br>population mean: 0.57              | (-)                | Wu et al. [37]                 |
| $h$                  | fraction of mildly infected individuals requiring hospitalisation                                                                                                               | [0.01 0.02 0.02 0.02 0.02 0.05 0.11 0.22 0.57]<br>population mean: 0.08              | (-)                | Inferred                       |
| $c$                  | fraction of hospitalisations not requiring ICU transfer                                                                                                                         | Table 4, population mean: 0.84                                                       | (-)                | Hospital dataset               |
| $d_a$                | duration of subclinical infection                                                                                                                                               | 6.54                                                                                 | days               | Inferred                       |
| $d_m$                | duration of mild infection                                                                                                                                                      | 7                                                                                    | days               | To et al. [32]                 |
| $d_{\text{hosp}}$    | average time from symptom onset to hospitalization                                                                                                                              | Table 6, population mean: 6.4                                                        | days               | Hospital dataset               |
| $d_{C,R}$            | length of cohort stay if recovered                                                                                                                                              | Table 5, population mean: 10.8                                                       | days               | Hospital dataset               |
| $d_{C,D}$            | length of cohort stay if deceased                                                                                                                                               | Table 5, population mean: 11.8                                                       | days               | Hospital dataset               |
| $d_{ICU,R}$          | length of ICU stay if recovered                                                                                                                                                 | Table 5, population mean: 12.0                                                       | days               | Hospital dataset               |
| $d_{ICU,D}$          | length of ICU stay if deceased                                                                                                                                                  | Table 5, population mean: 15.2                                                       | days               | Hospital dataset               |
| $d_{ICU,\text{rec}}$ | length of recovery and observation stay in cohort after ICU stay                                                                                                                | Table 6, population mean: 11.2                                                       | days               | Hospital dataset               |
| $m_C$                | mortality in cohort                                                                                                                                                             | Table 4, population mean: 0.17                                                       | (-)                | Hospital dataset               |
| $m_{ICU}$            | mortality in ICU                                                                                                                                                                | Table 4, population mean: 0.46                                                       | (-)                | Hospital dataset               |
| $\sigma$             | length of latent period                                                                                                                                                         | 4.5                                                                                  | days               | Computed                       |
| $\omega$             | length of presymptomatic infectious period                                                                                                                                      | 0.7                                                                                  | days               | Wei et al. [7], He et al. [29] |
| $\sigma + \omega$    | length of incubation period                                                                                                                                                     | 5.2                                                                                  | days               | Liu et al. [6]                 |
| $\beta$              | probability of infection upon contact with an individual capable of transmitting SARS-CoV-2 under the assumption that the infectee is 100 % susceptible to SARS-CoV-2 infection | 0.032                                                                                | (-)                | Inferred                       |
| $T_0$                | total population                                                                                                                                                                | [1.31 1.30 1.40 1.50 1.52 1.60 1.35 0.91 0.66]*1e6,<br>total population: 11.54 * 1e6 | people             | StatBEL [54]                   |
| $N_c$                | contact matrix                                                                                                                                                                  | 9x9 matrix                                                                           | days <sup>-1</sup> | Willem et al. [14]             |

816 **A.3 Key events**

817 The first lockdown, which started on March 15th, 2020, and lasted until May 4th, 2020 in-  
818 volved the closure of schools, bars, clubs, restaurants, all non-essential shops, and closure  
819 of the border to non-essential travel (Table 2). The GCMRs show a 56 % reduction in work-  
820 place mobility (Figure 2 and Table 2). Based on surveys from the Belgian National Bank,  
821 28.6 % of all employees were able to work from home, 29.9 % remained in the workplace  
822 and 4.4 % worked both from home and in the workplace. 32.4 % were temporary unem-  
823 ployed and 4.8 % were absent [55]. Public transport mobility decreased by 65 %, leisure  
824 mobility decreased by 72 %, and grocery & pharmacy mobility was reduced by 26 %. From  
825 March 15th, 2020 until May 4th, 2020, mobility remained practically constant at the afore-  
826 mentioned reductions. On May 4th, 2020 the lockdown was gradually lifted by re-opening  
827 all non-essential shops and lifting telework restrictions. The effect can be seen in the *Google*  
828 *Community Mobility Reports* (Figure 2), by the end of April, workplace and retail & recreation  
829 mobility gradually start increasing. By July 1st, 2020, almost all social measures had been  
830 lifted. During the first lockdown, schools remained fully closed until May 18th, 2020, and  
831 were only re-opened to a very limited extent before the end of the school year on July 1st,  
832 2020. For this reason, schools are assumed to remain closed during the first COVID-19 wave.  
833 During July, there were few social restrictions, and this resulted in new, localized infection  
834 clusters. During most of August 2020, a lockdown with a curfew was imposed in Belgium's  
835 Antwerp province. We do not attempt to model the hospitalizations during July and August  
836 2020, as modeling localized infection clusters with a nation-level epidemiological model can  
837 only be accomplished by severe ad-hoc tweaks in the social contact model. A spatial model  
838 extension was developed to better account for such localized phenomena.

839  
840 During the second lockdown from October 19th, 2020 until the present day (26/02/2021),  
841 workplace mobility has been reduced by approximately 25 %. During Autumn break and  
842 Christmas holidays, workplace mobility further declined to approximately 45 %. Public  
843 transport mobility decreased by 30 % and by 50 % during holidays, leisure mobility de-  
844 creased by 40-50 % and grocery & pharmacy mobility have decreased by approximately 5-10  
845 %. Primary and secondary schools were closed between October 19th, 2020, and re-opened  
846 on November 16th, 2020. Further, schools have been closed during the Christmas holidays  
847 from December 18th, 2020 until January 4th, 2021, and were closed during spring break from  
848 February 15th, 2021 until February 21th, 2021. Universities have remained fully closed since  
849 October 19th, 2020.

850  
851 During both lockdowns, increases in the categories *residential* and *parks* were observed (Fig-  
852 ure 2). These are indicative of decreased mobility, as these suggest increased activity around  
853 the home environment. The other four categories are more indicative of general mobility as

## A SUPPLEMENTARY MATERIALS

### A.3 Key events

854 they are related to activity around workplaces, retail outlets and use of public transporta-  
855 tion [43]. Thus, although the mobility figures indicate people spent more time at home, this  
856 does not mean people have more contacts at home (especially under stay-at-home orders).  
857 Amplifying the fraction of household contacts under lockdown measures would increase in-  
858 tergenerational mixing of the population under lockdown, which is unrealistic and will lead  
859 to overestimations of the hospitalizations. The inability to accurately capture the disease  
860 spread in home *bubbles* under lockdown measures is an inherent downside of compartmen-  
861 tal epidemiological models. We have thus not scaled the home interaction matrix ( $\mathbf{N}_{c,home}$ )  
862 with the residential mobility from the GCMRs.

Table 2: Dates of key events during the first and second lockdown in Belgium. Google mobility reduction (see Figure 2), computed as the average reduction between one key event and the next.

| Date                                            | Key event                  | Details                                                                                                                                                                          | $G_{work}$ | $G_{transit}$ | $G_{r\&r}$ | $G_{g\&p}$ | $H_{schools}$ |
|-------------------------------------------------|----------------------------|----------------------------------------------------------------------------------------------------------------------------------------------------------------------------------|------------|---------------|------------|------------|---------------|
| First COVID-19 wave (March - July 2020)         |                            |                                                                                                                                                                                  |            |               |            |            |               |
| 15/03/2020                                      | Lockdown                   | Closure of schools, bars, clubs and restaurants; Closure of all non-essential shops; Non-essential travel forbidden. [56]                                                        | -56 %      | -65 %         | -72 %      | -26 %      | -100 %        |
| 04/05/2020                                      | Lockdown release phase Ia  | Re-opening of industry and B2B services. Re-opening of non-essential retail. Merging of two <i>social bubbles</i> allowed [57].                                                  | -44 %      | -54 %         | -57 %      | -18 %      | -100 %        |
| 11/05/2020                                      | Lockdown release phase Ib  | Re-opening of all businesses and shops. Working at home remains the norm where possible.                                                                                         | -38 %      | -45 %         | -46 %      | -12 %      | -100 %        |
| 18/05/2020                                      | Lockdown release phase IIa | Re-opening of businesses that involve the most human-human contact (f.i. hairdressers). Re-opening of schools for graduating classes in elementary and secondary education [58]. | -38 %      | -39 %         | -39 %      | -8 %       | -100 %        |
| 04/06/2020                                      | Lockdown release phase III | Re-opening of bars and restaurants. Gatherings up to 10 persons are allowed.                                                                                                     | -22 %      | -27 %         | -15 %      | -4 %       | -100 %        |
| 01/07/2020                                      | Lockdown release phase IV  | Closure of schools for summer holidays. Gatherings of up to 15 persons are allowed.                                                                                              | -32 %      | -27 %         | -11 %      | -8 %       | -100 %        |
| 01/08/2020                                      | Antwerp Lock-down          | The number of infections starts increasing in Antwerp province, where a second lockdown with curfew is imposed [59].                                                             | -28 %      | -33 %         | -32 %      | -6 %       | -100 %        |
| Second COVID-19 wave (September 2020 - present) |                            |                                                                                                                                                                                  |            |               |            |            |               |
| 01/09/2020                                      | End of summer holidays     | Opening of elementary and secondary schools.                                                                                                                                     | -18 %      | -17 %         | -14 %      | -5 %       | -0 %          |
| 19/10/2020                                      | Lockdown                   | Closure of bars and restaurants; Curfew; Strict social restrictions. [60]                                                                                                        | -26 %      | -31 %         | -39 %      | -3 %       | -0 %          |
| 02/11/2020                                      | Lockdown                   | Closure of non-essential stores; Closure of all schools. [61]                                                                                                                    | -43 %      | -48 %         | -55 %      | -13 %      | -100 %        |
| 16/11/2020                                      | Schools reopen             | Elementary and secondary schools reopen. Universities remain closed.                                                                                                             | -27 %      | -37 %         | -44 %      | -5 %       | -0 %          |
| 12/18/2020 - 04/01/2021                         | Christmas holidays         | Elementary and secondary schools close. Decrease in work related mobility.                                                                                                       | -45 %      | -47 %         | -42 %      | -4 %       | -100 %        |
| 04/01/2021 - 15/02/2021                         | Period between holidays    | Elementary and secondary schools reopen. British variant (501Y.V1) starts spreading [62]. Vaccination campaign in elderly homes starts [63].                                     | -27 %      | -38 %         | -43 %      | -6 %       | -0 %          |

A SUPPLEMENTARY MATERIALS

A.4 Basic reproduction number

863 **A.4 Basic reproduction number**

864 Since the system of differential equations (Eq. 1 - Eq. 12), is autonomous, the eigenvalues of  
 865 the Jacobian matrix evaluated at its hyperbolic equilibrium point can be used to determine  
 866 the nature of that equilibrium [64]. The basic reproduction number ( $R_0$ ) is computed as  
 867 the spectral radius of the Jacobian matrix at the disease-free equilibrium [27]. Our model  
 868 has seven infected states:  $E$ ,  $I_{presy}$ ,  $I_{asy}$ ,  $Q_{mild}$ ,  $Q_{cohort}$ ,  $Q_{ICU}$  and  $Q_{ICU,rec}$  (Figure 1). At the  
 869 disease-free equilibrium, the whole population is susceptible to the infectious disease,  $S_i =$   
 870  $T_i$ ,

$$\mathbf{u}^* = (T_i, 0, 0, 0, 0, 0, 0, 0, 0). \quad (26)$$

871 The Jacobian  $\mathbf{J}$  is defined as,

$$\mathbf{J} = \begin{bmatrix} \left. \frac{\partial f_1}{\partial x_1} \right|_{\mathbf{u}^*} & \cdots & \left. \frac{\partial f_1}{\partial x_n} \right|_{\mathbf{u}^*} \\ \vdots & \ddots & \vdots \\ \left. \frac{\partial f_m}{\partial x_1} \right|_{\mathbf{u}^*} & \cdots & \left. \frac{\partial f_m}{\partial x_n} \right|_{\mathbf{u}^*} \end{bmatrix}, \quad (27)$$

872 where  $n$  and  $m$  are equal to the number of infected compartments. Next, the Jacobian is  
 873 decomposed in the following form,

$$\mathbf{J}^* = (\mathbf{T} + \mathbf{\Sigma})\mathbf{J}. \quad (28)$$

874 The matrix  $\mathbf{T}$  contains all terms that lead to *transmissions* of SARS-CoV-2, while  $\mathbf{\Sigma}$  contains  
 875 all terms that lead to *transitions*. For our model,

$$\mathbf{T} = \begin{bmatrix} 0 & \beta \sum_{j=1}^N N_{c,ij} & \beta \sum_{j=1}^N N_{c,ij} & 0 & 0 & 0 & 0 \\ 0 & 0 & 0 & 0 & 0 & 0 & 0 \\ \vdots & \vdots & \vdots & \vdots & \vdots & \vdots & \vdots \\ 0 & 0 & 0 & 0 & 0 & 0 & 0 \end{bmatrix}, \quad (29)$$

876 where an entry  $T_{i,j}$  is the rate at which individuals in infected state  $j$  gives rise to individuals  
 877 in infected state  $i$ . And,

$$\mathbf{\Sigma} = \begin{bmatrix} -1/\sigma & 0 & 0 & 0 & 0 & 0 & 0 \\ 1/\sigma & -1/\omega & 0 & 0 & 0 & 0 & 0 \\ 0 & a_i/\omega & -1/d_a & 0 & 0 & 0 & 0 \\ 0 & (1 - a_i)/\omega & 0 & -\left(\frac{1-h_i}{d_m} + \frac{h_i}{d_{hosp}}\right) & 0 & 0 & 0 \\ 0 & 0 & 0 & \frac{c_i h_i}{d_{hosp}} & -\left(\frac{m_{C,i}}{d_{c,D,i}} + \frac{1-m_{C,i}}{d_{c,R,i}}\right) & 0 & 0 \\ 0 & 0 & 0 & \frac{(1-c_i)h_i}{d_{hosp}} & 0 & -\left(\frac{m_{ICU,i}}{d_{ICU,D,i}} + \frac{1-m_{ICU,i}}{d_{ICU,R,i}}\right) & 0 \\ 0 & 0 & 0 & 0 & 0 & \frac{1-m_{ICU,i}}{d_{ICU,R,i}} & -\frac{1}{d_{ICU,rec,i}} \end{bmatrix}, \quad (30)$$

878 where an element  $\Sigma_{i,j}^{-1}$  is the expected time that an individual who presently has state  $j$  will  
 879 spend in state  $i$  during its entire epidemiological *life*. The next generation matrix (NGM) is  
 880 then calculated as,

$$\text{NGM} = -T\Sigma^{-1}. \quad (31)$$

881 The basic reproduction number  $R_0$  is defined as the spectral radius<sup>3</sup>  $\rho$  of this matrix [27],

$$R_0 = \rho(-T\Sigma^{-1}), \quad (32)$$

882 which becomes for our model,

$$R_{0,i} = (a_i d_a + \omega) \beta \sum_{j=1}^N N_{c,ij}. \quad (33)$$

883 A linear relationship between the reproduction number and the chance of infection upon  
 884 contact ( $\beta$ ), the number of contacts ( $N_c$ ) and the sum of the durations of infectiousness for  
 885 those compartments able to infect susceptibles makes sense.

## 886 A.5 Time-lagged cross correlation

887 We extracted the number of laboratory confirmed cases in youths  $[0, 20[$ , the working pop-  
 888 ulation  $[20, 60[$  and the senior population  $[60, \infty[$  from the *Belgian Scientific Institute of Public*  
 889 *Health* (<https://epistat.sciensano.be/Data>) from November 2nd, 2020 to February  
 890 1st 2020. We then normalized the timeseries with the number of cases on November 21st,  
 891 2020 and visualized the result in Figure 4. Using the Python module *pandas*, the dataseries  
 892 were shifted with  $k$  days and the cross correlation was computed. The procedure was per-  
 893 formed for  $k \in [-15, 5]$  days, the resulting *cross correlation function* is shown in Figure 8 and  
 894 the results of the analysis are summarized in Table 3. Next, we constructed a statistical test to  
 895 check if the covariance between two series  $x$  and  $y$ , shifted with the number of days resulting  
 896 in the maximum covariance,  $k_{max}$ , varied significantly from zero. Thus, the null hypothesis  
 897 is,

$$H_0 : \rho_{xy}(k_{max}) = 0.0. \quad (34)$$

898 If the cross correlation of lag  $k_{max}$  is zero, then, for a fairly large timeseries consisting of  $n$   
 899 datapoints, the covariance  $\rho_{xy}(k_{max})$  will be approximately normally distributed, with mean  
 900 zero and standard deviation  $\sigma = \frac{1}{\sqrt{n-|k|}}$ . Since approximately 95% of a normal population  
 901 is within 2 standard deviations of the mean, a test will reject the hypothesis that the cross  
 902 correlation of lag  $k$  equals zero when,

$$|\rho(k)| \geq \frac{2}{\sqrt{n-|k|}}. \quad (35)$$

903 The null hypothesis was rejected for all timeseries.

904

---

<sup>3</sup>Largest absolute eigenvalue.

A SUPPLEMENTARY MATERIALS

A.6 Supplementary data and figures

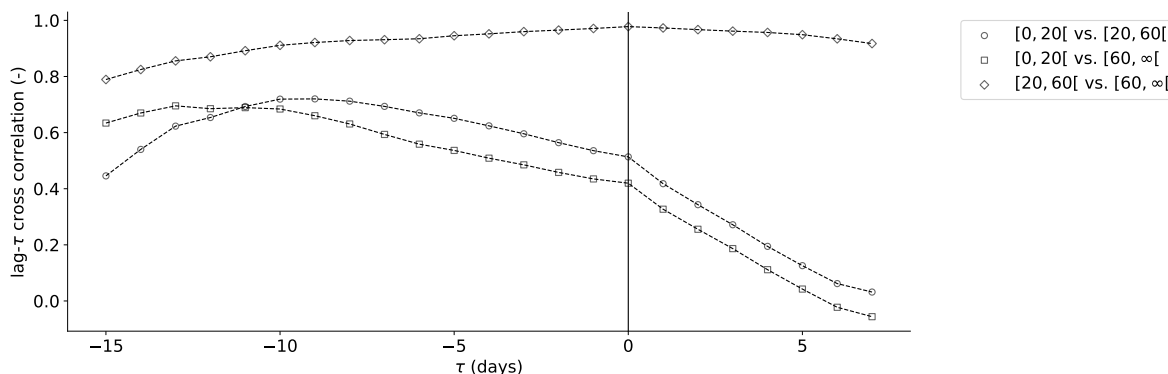

**Figure 8:** Cross correlation between the number of cases in Belgium in the age groups  $[0-20[$ ,  $[20-60[$  and  $[60-\infty[$ , from November 2nd, 2020 until February 1st 2020 in function of the number of days the timeseries are shifted relative to each other ( $\tau$ ). The maximum cross correlation is obtained when the series  $[0-20[$  and  $[20-60[$  are shifted -9 days, the maximum cross correlation is obtained when the series  $[0-20[$  and  $[60-\infty[$  are shifted -13 days, and the maximum cross correlation is obtained when the series  $[20-60[$  and  $[60-\infty[$  are not shifted.

Table 3: Results of the time-lagged cross-correlation between the number of cases in the age groups  $[0-20[$ ,  $[20-60[$  and  $[60-\infty[$ . Data from November 2nd, 2020 until February 1st 2020 were used in the analysis, which is equal to the daterange range shown in Figure 4.

| Age group (years)           | Time-lag (days) | Covariance (-) |
|-----------------------------|-----------------|----------------|
| $[0-20[$ vs. $[20-60[$      | -9              | 0.72           |
| $[0-20[$ vs. $[60-\infty[$  | -13             | 0.70           |
| $[20-60[$ vs. $[60-\infty[$ | 0               | 0.98           |

905 A.6 Supplementary data and figures

A.6 Supplementary data and figures

A SUPPLEMENTARY MATERIALS

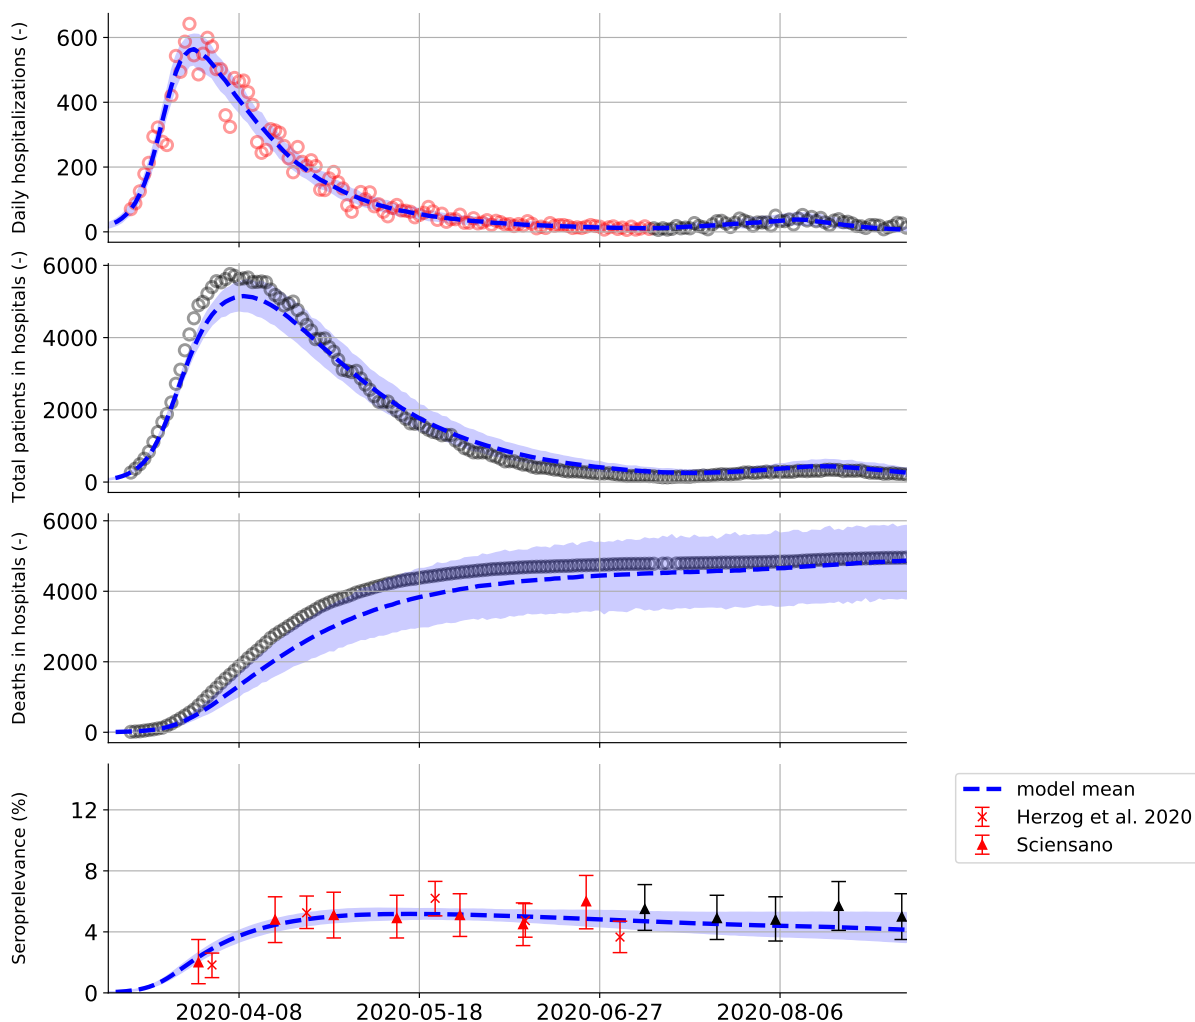

**Figure 9:** (top to bottom) Model predictions and data during the first COVID-19 wave in Belgium, from March 15th, 2020 until September 1st, 2020: 1) The daily Belgian hospitalizations, 2) the total number of patients in Belgium hospitals, 3) the total number of deceased patients in Belgian hospitals, 4) the seroprevalence in the Belgian population. Mean and 95 % confidence interval of 1000 model realisations. Red datapoints indicate the data was used in the model calibration, black datapoints indicate data was not used in the model calibration. The model is calibrated to the daily Belgian hospitalizations (top), the prediction for the total number of patients in Belgian hospitals and total number of deceased patients in Belgian hospitals are obtained by propagating the age-stratified mortalities ( $m_C$  and  $m_{ICU}$ ), age-stratified distributions between cohort and ICU ( $c$ ) and the residence time distributions derived from the hospital dataset in the model ( $d_{C,R}$ ,  $d_{C,ICU}$ ,  $d_{ICU,R}$ ,  $d_{ICU,D}$ ) (see Table 4 and 5).



A SUPPLEMENTARY MATERIALS

A.6 Supplementary data and figures

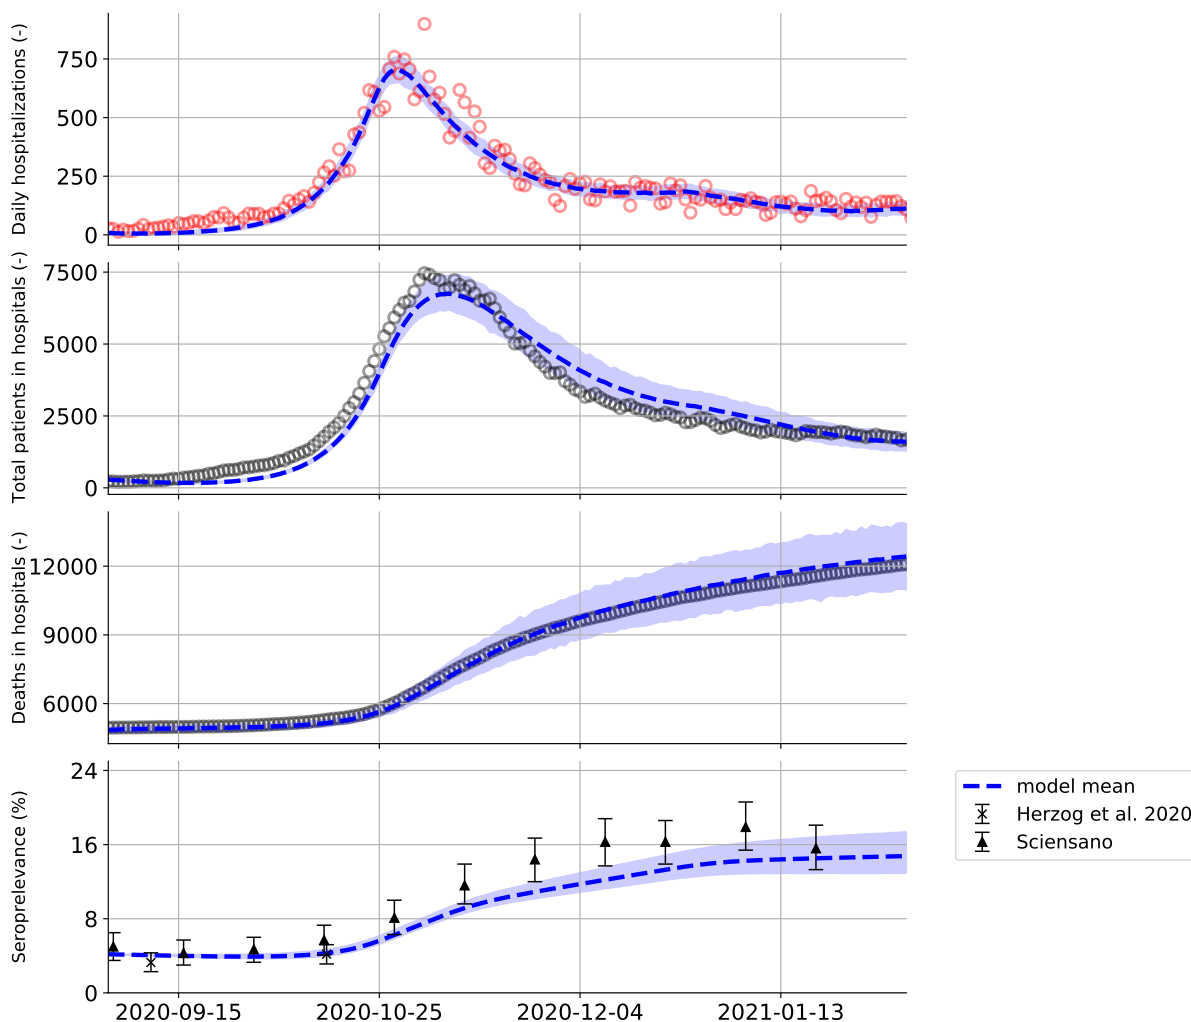

**Figure 10:** (top to bottom) Model predictions and data during the second COVID-19 wave in Belgium, from September 1st, 2020 until February 1st, 2021: 1) The daily Belgian hospitalizations, 2) the total number of patients in Belgium hospitals, 3) the total number of deceased patients in Belgian hospitals, 4) the seroprevalence in the Belgian population. Mean and 95 % confidence interval of 1000 model realisations. Red datapoints indicate the data was used in the model calibration, black datapoints indicate data was not used in the model calibration. The model is calibrated to the daily Belgian hospitalizations (top), the prediction for the total number of patients in Belgian hospitals and total number of deceased patients in Belgian hospitals are obtained by propagating the age-stratified mortalities ( $m_C$  and  $m_{ICU}$ ), age-stratified distributions between cohort and ICU ( $e$ ) and the residence time distributions derived from the hospital dataset in the model ( $d_{C,R}$ ,  $d_{C,ICU}$ ,  $d_{ICU,R}$ ,  $d_{ICU,D}$ ) (see Table 4 and 5).

A.6 Supplementary data and figures

A SUPPLEMENTARY MATERIALS

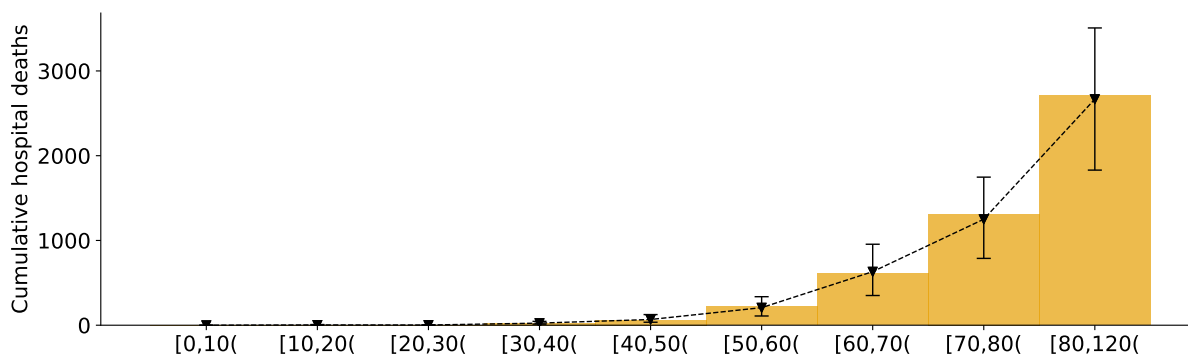

**Figure 11:** Cumulative deaths in Belgian hospitals per ten-year age strata. For the first Belgian 2020 COVID-19 wave, from March 1st, 2020 until September 1st, 2020. Yellow bars represent the data collected by Sciensano, inverted triangles represent the model prediction mean with 95 % confidence interval.

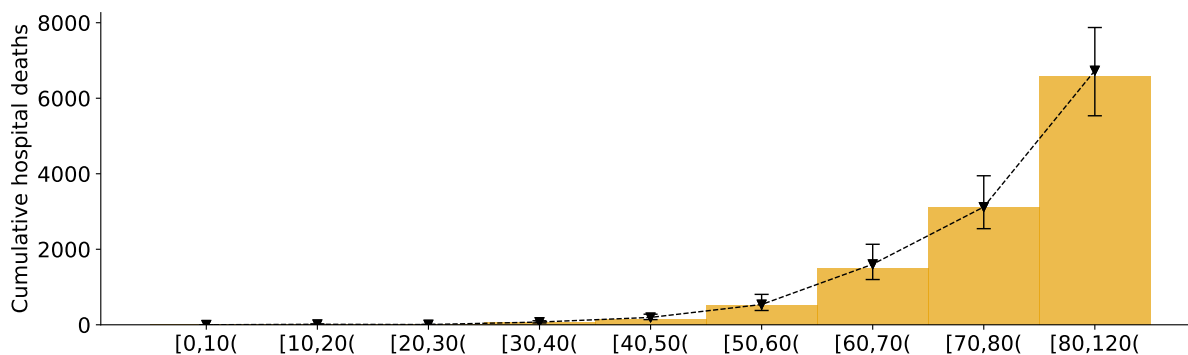

**Figure 12:** Cumulative deaths in Belgian hospitals per ten-year age strata. For the second Belgian 2020 COVID-19 wave, from September 1st, 2020 until February 1st, 2021. Yellow bars represent the data collected by Sciensano, inverted triangles represent the model prediction mean with 95 % confidence interval.

A SUPPLEMENTARY MATERIALS

A.6 Supplementary data and figures

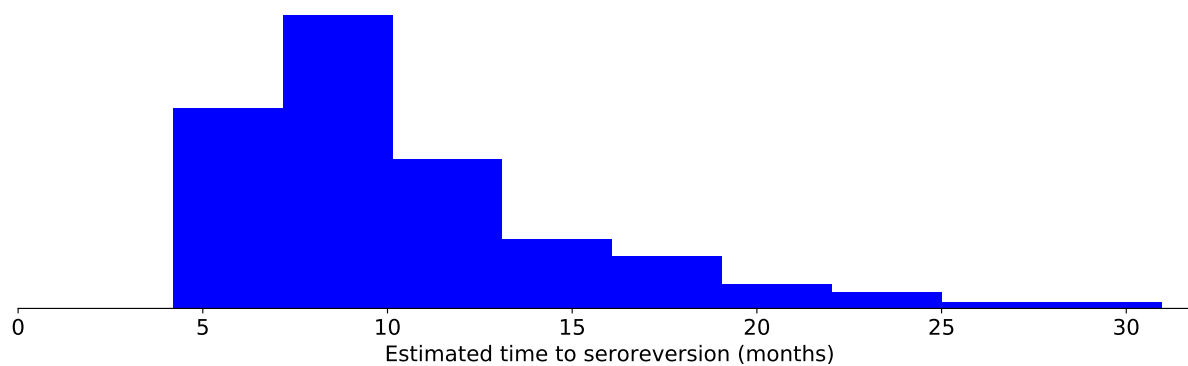

**Figure 13:** Estimated distribution of the time to seroreversion ( $1/\zeta$ ). The mean time to seroreversion is 9.2 months (IQR: 7.2 months - 12.1 months).

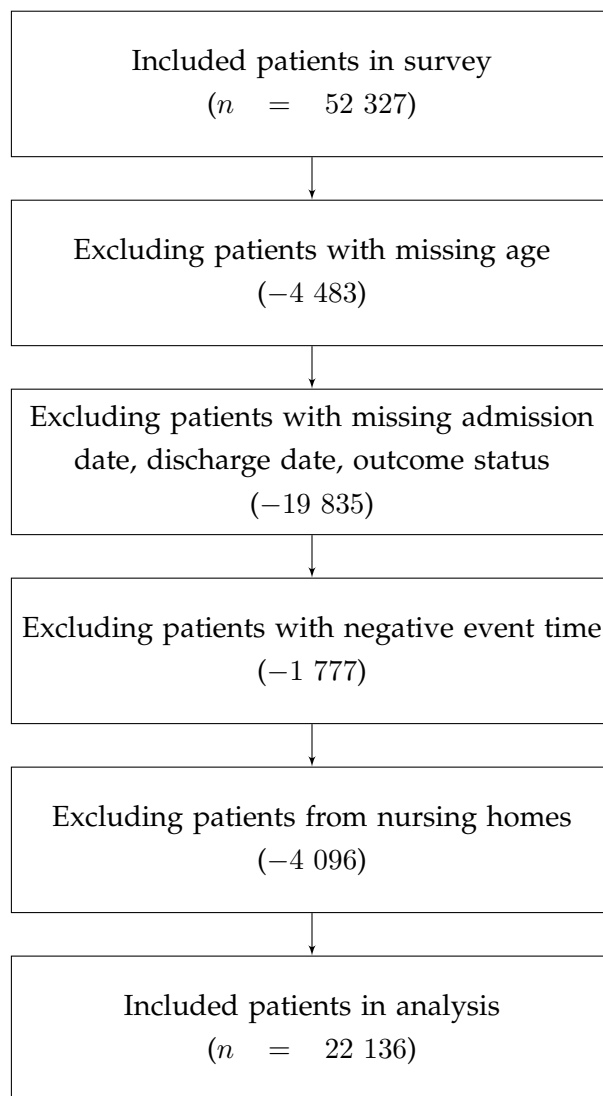

**Figure 14:** Flow diagram illustrating the number of patient data excluded from the survey and the reason thereof.

A SUPPLEMENTARY MATERIALS

A.6 Supplementary data and figures

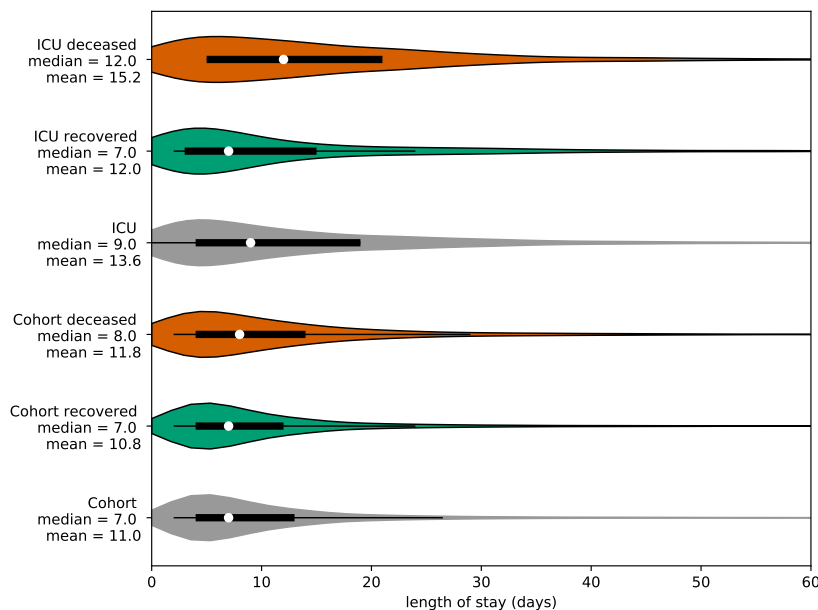

**Figure 15:** Observations of the length of a hospital stay for patients in cohort and ICU wards. Overall (gray), if recovered (green), if deceased (red). Residence times in cohort are shorter than residence times in ICU. In both wards, recovered patients have longer stays than deceased patients.

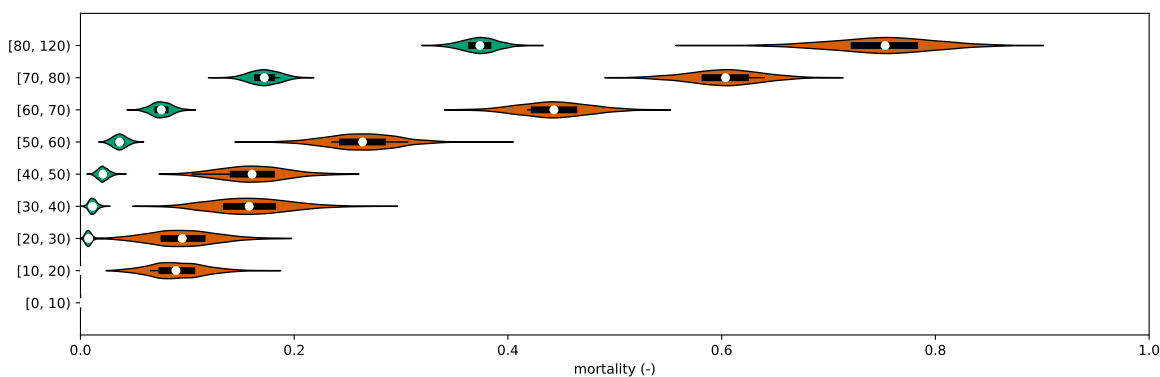

**Figure 16:** Mortality in cohort ( $m_C$ , green) and mortality in ICU ( $m_{ICU}$ , red) per ten-year age strata. Obtained by bootstrap resampling of the Belgian COVID-19 clinical surveillance on hospitalizations by Van Goethem et al. [40]. Mortality in both wards increases with patient age, mortality in ICU is higher than mortality in cohort.

Table 4: Computed fraction of hospitalized patients remaining in cohort and not transferring to ICU ( $c$ ), pooled mortality in cohort and ICU ( $m_{C,ICU}$ ), mortality in cohort ( $m_C$ ) and mortality in ICU ( $m_{ICU}$ ) per ten-year age strata. Estimates obtained by bootstrap resampling from the Belgian COVID-19 clinical surveillance on hospitalizations by Van Goethem et al. [40].

| Age group         | n (-)  | $c$ (%) |             | $m_{C,ICU}$ (%) |             | $m_C$ (%) |             | $m_{ICU}$ (%) |             |
|-------------------|--------|---------|-------------|-----------------|-------------|-----------|-------------|---------------|-------------|
|                   |        | mean    | 95% CI      | mean            | 95% CI      | mean      | 95% CI      | mean          | 95% CI      |
| [0, 10[           | 404    | 98.0    | 97.7 - 98.3 | 0.0             | NA          | 0.0       | NA          | 0.0           | NA          |
| [10, 20[          | 169    | 87.0    | 86.3 - 87.7 | 1.2             | 1.0 - 1.4   | 0.0       | NA          | 8.9           | 7.3 - 10.7  |
| [20, 30[          | 578    | 91.1    | 90.1 - 91.6 | 1.5             | 1.3 - 1.8   | 0.8       | 0.6 - 1.0   | 9.5           | 7.5 - 11.7  |
| [30, 40[          | 1042   | 89.8    | 89.1 - 90.4 | 2.7             | 2.4 - 3.0   | 1.1       | 0.9 - 1.4   | 15.8          | 13.3 - 18.3 |
| [40, 50[          | 1873   | 85.8    | 85.1 - 86.5 | 4.1             | 3.7 - 4.6   | 2.1       | 1.8 - 2.5   | 16.1          | 14.0 - 18.2 |
| [50, 60[          | 3267   | 80.9    | 80.1 - 81.7 | 8.0             | 7.4 - 8.6   | 3.7       | 3.2 - 4.1   | 26.4          | 24.2 - 28.6 |
| [60, 70[          | 3952   | 75.9    | 75.0 - 76.8 | 16.4            | 15.6 - 17.2 | 7.6       | 6.9 - 8.2   | 44.3          | 42.1 - 46.5 |
| [70, 80[          | 4844   | 78.3    | 77.4 - 79.2 | 26.6            | 25.7 - 27.6 | 17.2      | 16.3 - 18.2 | 60.3          | 58.1 - 62.6 |
| [80, $\infty$ [   | 6007   | 91.8    | 91.2 - 92.3 | 40.4            | 39.4 - 41.5 | 37.4      | 36.3 - 38.4 | 75.3          | 72.0 - 78.4 |
| <b>Population</b> | 22 136 | 83.8    | 83.0 - 84.6 | 21.4            | 20.6 - 22.3 | 16.6      | 15.7 - 17.5 | 46.3          | 43.8 - 49.0 |

46

906

907

Table 5: Hospital residence time in cohort, irregardless of COVID-19 outcome ( $d_C$ ), residence time in cohort, in case of recovery ( $d_{C,R}$ ), residence time in cohort, in case of death ( $d_{C,D}$ ). Hospital residence time in IC, irregardless of COVID-19 outcome ( $d_{ICU}$ ), residence time in IC, in case of recovery ( $d_{ICU,R}$ ), residence time in IC, in case of death ( $d_{ICU,D}$ ) per ten-year age strata. Scale and shape parameters of Weibull distribution fitted to the residence time data. Estimates obtained by analyzing a subset of data from the Belgian COVID-19 clinical surveillance on hospitalizations by Van Goethem et al. [40].

| Age group         | $d_C$ (days)     |            |       |       | $d_{C,R}$ (days)   |            |       |       | $d_{C,D}$ (days)   |            |       |       |
|-------------------|------------------|------------|-------|-------|--------------------|------------|-------|-------|--------------------|------------|-------|-------|
|                   | mean             | IQR        | scale | shape | mean               | IQR        | scale | shape | mean               | IQR        | scale | shape |
| [0, 10[           | 3.4              | 2.0 - 4.0  | 3.66  | 1.22  | 3.4                | 2.0 - 4.0  | 3.66  | 1.22  | NA                 | NA         | NA    | NA    |
| [10, 20[          | 6.3              | 2.0 - 7.0  | 5.64  | 0.85  | 6.3                | 2.0 - 7.0  | 5.64  | 0.85  | NA                 | NA         | NA    | NA    |
| [20, 30[          | 4.9              | 2.0 - 5.0  | 4.86  | 0.98  | 4.9                | 2.0 - 5.0  | 4.86  | 0.98  | 5.0                | 3.5 - 6.0  | 5.67  | 2.10  |
| [30, 40[          | 5.5              | 3.0 - 6.0  | 5.77  | 1.12  | 5.5                | 3.0 - 6.0  | 5.77  | 1.12  | 6.1                | 2.0 - 11.0 | 6.38  | 1.13  |
| [40, 50[          | 6.3              | 3.0 - 8.0  | 6.81  | 1.22  | 6.3                | 3.0 - 8.0  | 6.81  | 1.22  | 6.8                | 2.3 - 8.8  | 6.94  | 1.03  |
| [50, 60[          | 7.6              | 4.0 - 9.0  | 8.12  | 1.16  | 7.6                | 4.0 - 9.0  | 8.07  | 1.17  | 9.1                | 3.0 - 10.0 | 9.16  | 1.01  |
| [60, 70[          | 10.0             | 4.0 - 11.0 | 10.32 | 1.08  | 9.9                | 4.0 - 11.0 | 10.31 | 1.10  | 11.2               | 3.0 - 14.0 | 10.32 | 0.86  |
| [70, 80[          | 12.6             | 5.0 - 14.0 | 13.11 | 1.10  | 12.6               | 5.0 - 14.0 | 13.24 | 1.13  | 12.6               | 4.0 - 13.0 | 12.42 | 0.97  |
| [80, $\infty$ [   | 15.6             | 6.0 - 19.0 | 16.37 | 1.13  | 17.8               | 8.0 - 22.0 | 19.1  | 1.21  | 11.9               | 4.0 - 15.0 | 12.21 | 1.06  |
| <b>Population</b> | 11.0             | 4.0 - 13.0 | 9.09  | 1.21  | 10.8               | 4.0 - 12.0 | 8.72  | 1.24  | 11.8               | 4.0 - 14.0 | 10.97 | 1.08  |
| Age group         | $d_{ICU}$ (days) |            |       |       | $d_{ICU,R}$ (days) |            |       |       | $d_{ICU,D}$ (days) |            |       |       |
|                   | mean             | IQR        | scale | shape | mean               | IQR        | scale | shape | mean               | IQR        | scale | shape |
| [0, 10[           | 6.0              | 2.0 - 8.3  | 6.40  | 1.19  | 6.7                | 2.0 - 8.5  | 7.37  | 1.37  | NA                 | NA         | NA    | NA    |
| [10, 20[          | 4.9              | 2.0 - 5.0  | 5.26  | 1.25  | 4.0                | 2.0 - 5.0  | 4.44  | 1.43  | 16.0               | NA         | NA    | NA    |
| [20, 30[          | 9.6              | 2.0 - 10.0 | 8.86  | 0.87  | 8.9                | 2.0 - 10.0 | 8.34  | 0.89  | 18.0               | 4.5 - 25.5 | 16.97 | 0.89  |
| [30, 40[          | 10.1             | 2.0 - 13.3 | 11.08 | 1.00  | 9.4                | 2.0 - 11.0 | 8.72  | 0.87  | 14.0               | 5.0 - 20.0 | 14.86 | 1.20  |
| [40, 50[          | 11.3             | 3.0 - 14.0 | 12.75 | 1.00  | 10.6               | 3.0 - 12.0 | 10.34 | 0.95  | 15.1               | 4.5 - 21.0 | 16.38 | 1.30  |
| [50, 60[          | 14.1             | 5.0 - 19.0 | 1.05  | 1.00  | 11.7               | 4.0 - 15.8 | 12.02 | 1.08  | 19.7               | 8.5 - 27.0 | 20.60 | 1.16  |
| [60, 70[          | 14.7             | 5.0 - 21.0 | 1.05  | 1.00  | 13.2               | 4.0 - 17.0 | 13.00 | 0.97  | 16.5               | 6.0 - 23.0 | 17.52 | 1.21  |
| [70, 80[          | 15.0             | 5.0 - 21.0 | 1.05  | 1.00  | 14.6               | 4.0 - 21.0 | 14.47 | 0.98  | 15.2               | 6.0 - 21.0 | 15.83 | 1.12  |
| [80, $\infty$ [   | 10.8             | 3.0 - 14.0 | 12.58 | 1.00  | 7.9                | 2.0 - 9.0  | 7.54  | 0.92  | 11.7               | 3.0 - 15.0 | 11.25 | 0.92  |
| <b>Population</b> | 13.6             | 4.0 - 19.0 | 11.41 | 1.21  | 12.0               | 3.0 - 15.0 | 12.32 | 0.98  | 15.2               | 5.0 - 21.0 | 13.77 | 1.10  |

A.6 Supplementary data and figures

A SUPPLEMENTARY MATERIALS

Table 6: Hospital residence time for a recovery stay in cohort, after a stay in ICU ( $d_{ICU,rec}$ ), time from symptom onset to hospitalization ( $d_{hospital}$ ) per ten-year age strata. Scale and shape parameters of Weibull distribution fitted to the residence time data. Estimates obtained by analyzing a subset of data from the Belgian COVID-19 clinical surveillance on hospitalizations by Van Goethem et al. [40].

| Age group         | $d_{ICU,rec}$ (days) |            |       |       | $d_{hosp}$ (days) |            |       |       |
|-------------------|----------------------|------------|-------|-------|-------------------|------------|-------|-------|
|                   | mean                 | IQR        | scale | shape | mean              | IQR        | scale | shape |
| [0, 10[           | 9.9                  | 0.5 - 3.0  | 3.18  | 0.40  | 2.2               | 0.0 - 2.0  | 0.86  | 0.43  |
| [10, 20[          | 3.4                  | 3.0 - 4.0  | 2.99  | 0.70  | 5.6               | 2.0 - 6.0  | 4.69  | 0.73  |
| [20, 30[          | 8.4                  | 3.0 - 10.8 | 8.18  | 0.94  | 6.0               | 2.0 - 7.0  | 5.33  | 0.75  |
| [30, 40[          | 6.6                  | 2.0 - 7.0  | 5.88  | 0.80  | 6.7               | 3.0 - 9.0  | 6.78  | 1.02  |
| [40, 50[          | 8.2                  | 3.0 - 8.0  | 7.97  | 0.94  | 7.4               | 4.0 - 9.0  | 7.69  | 1.14  |
| [50, 60[          | 10.1                 | 4.0 - 11.0 | 10.02 | 0.99  | 7.5               | 4.0 - 10.0 | 7.73  | 1.08  |
| [60, 70[          | 11.5                 | 4.0 - 14.0 | 11.58 | 1.01  | 6.9               | 3.0 - 9.0  | 6.87  | 0.97  |
| [70, 80[          | 15.2                 | 6.0 - 20.0 | 15.29 | 1.02  | 6.6               | 2.0 - 8.0  | 5.72  | 0.75  |
| [80, $\infty$ [   | 13.3                 | 6.0 - 16.0 | 14.11 | 1.23  | 5.0               | 1.0 - 7.0  | 3.62  | 0.59  |
| <b>Population</b> | 11.2                 | 4.0 - 13.0 | 8.39  | 1.40  | 6.4               | 2.0 - 8.0  | 10.11 | 0.63  |



A SUPPLEMENTARY MATERIALS

A.6 Supplementary data and figures

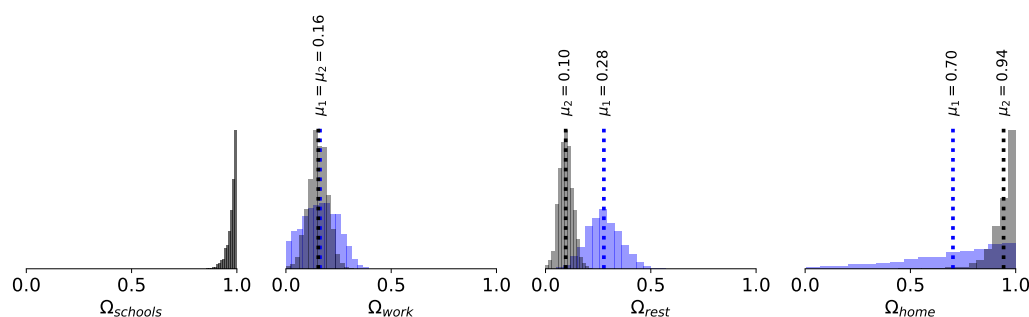

**Figure 17:** Inferred effectivity parameters at home ( $\Omega_{home}$ ), in the workplace ( $\Omega_{work}$ ), in schools ( $\Omega_{schools}$ ) and for the sum of leisure activities, other activities and public transport ( $\Omega_{rest}$ ), for the first COVID-19 wave (blue) and for the second COVID-19 wave (black). The effectivity of contacts in schools could not be deduced during the first COVID-19 wave because schools remained practically closed until July 1st, 2020. However, a high effectivity of contacts in schools could be deduced during the second COVID-19 wave. The effectivity of work contacts was roughly the same during both 2020 COVID-19 waves. The effectivity of leisure contacts was estimated to be lower during the second COVID-19 wave, however, leisure policies were not varied (yet) during the second COVID-19 wave, so the estimate must be taken with a grain of salt. Home contacts were deemed more effective by the model during the second COVID-19 wave.

REFERENCES

REFERENCES

909 **References**

- 910 [1] Qun Li, Xuhua Guan, Peng Wu, Xiaoye Wang, Lei Zhou, Yeqing Tong, Ruiqi Ren,  
911 Kathy S.M. Leung, Eric H.Y. Lau, Jessica Y. Wong, Xuesen Xing, Nijuan Xiang, Yang  
912 Wu, Chao Li, Qi Chen, Dan Li, Tian Liu, Jing Zhao, Man Liu, Wenxiao Tu, Chuding  
913 Chen, Lianmei Jin, Rui Yang, Qi Wang, Suhua Zhou, Rui Wang, Hui Liu, Yinbo Luo,  
914 Yuan Liu, Ge Shao, Huan Li, Zhongfa Tao, Yang Yang, Zhiqiang Deng, Boxi Liu, Zhi-  
915 tao Ma, Yanping Zhang, Guoqing Shi, Tommy T.Y. Lam, Joseph T. Wu, George F. Gao,  
916 Benjamin J. Cowling, Bo Yang, Gabriel M. Leung, and Zijian Feng. Early transmis-  
917 sion dynamics in wuhan, china, of novel coronavirus-infected pneumonia. *New Eng-  
918 land Journal of Medicine*, 0(0):null, 2020. doi: 10.1056/NEJMoa2001316. URL <https://doi.org/10.1056/NEJMoa2001316>.  
919 [//doi.org/10.1056/NEJMoa2001316](https://doi.org/10.1056/NEJMoa2001316).
- 920 [2] Julien Riou and Christian L. Althaus. Pattern of early human-to-human transmission  
921 of wuhan 2019 novel coronavirus (2019-ncov), december 2019 to january 2020. *Euro-  
922 surveillance*, 25(4):2000058, 2020. doi: [https://doi.org/10.2807/1560-7917.ES.2020.](https://doi.org/10.2807/1560-7917.ES.2020.25.4.2000058)  
923 [25.4.2000058](https://doi.org/10.2807/1560-7917.ES.2020.25.4.2000058). URL [https://www.eurosurveillance.org/content/10.2807/  
924 1560-7917.ES.2020.25.4.2000058](https://www.eurosurveillance.org/content/10.2807/1560-7917.ES.2020.25.4.2000058).
- 925 [3] Nicholas G Davies, Petra Klepac, Yang Liu, Kiesha Prem, Mark Jit, Carl A B Pear-  
926 son, Billy J Quilty, Adam J Kucharski, Hamish Gibbs, Samuel Clifford, Amy Gimma,  
927 Kevin van Zandvoort, James D Munday, Charlie Diamond, W John Edmunds, Rein M  
928 G J Houben, Joel Hellewell, Timothy W Russell, Sam Abbott, Sebastian Funk, Nikos I  
929 Bosse, Yueqian Fiona Sun, Stefan Flasche, Alicia Rosello, Christopher I Jarvis, Ros-  
930 alind M Eggo, and CMMID COVID-19 working Group. Age-dependent effects in  
931 the transmission and control of COVID-19 epidemics. *Nature Medicine*, 2020. ISSN  
932 1546-170X. doi: 10.1038/s41591-020-0962-9. URL [https://doi.org/10.1038/  
933 s41591-020-0962-9](https://doi.org/10.1038/s41591-020-0962-9).
- 934 [4] Robert Verity, Lucy C Okell, Ilaria Dorigatti, Peter Winskill, Charles Whittaker, Nat-  
935 suko Imai, Gina Cuomo-Dannenburg, Hayley Thompson, Patrick G T Walker, Han Fu,  
936 Amy Dighe, Jamie T Griffin, Marc Baguelin, Sangeeta Bhatia, Adhiratha Boonyasiri,  
937 Anne Cori, Zulma Cucunubá, Rich FitzJohn, Katy Gaythorpe, Will Green, Arran Ham-  
938 let, Wes Hinsley, Daniel Laydon, Gemma Nedjati-Gilani, Steven Riley, Sabine van El-  
939 sland, Erik Volz, Haowei Wang, Yuanrong Wang, Xiaoyue Xi, Christl A Donnelly,  
940 Azra C Ghani, and Neil M Ferguson. Estimates of the severity of coronavirus dis-  
941 ease 2019: a model-based analysis. *The Lancet Infectious Diseases*, may 2020. ISSN  
942 1473-3099. doi: 10.1016/S1473-3099(20)30243-7. URL [https://doi.org/10.1016/  
943 S1473-3099\(20\)30243-7](https://doi.org/10.1016/S1473-3099(20)30243-7).
- 944 [5] Geert Molenberghs, Christel Faes, Jan Aerts, Heidi Theeten, Brecht Devleeschauwer,

REFERENCES

REFERENCES

- 945 Natalia Bustos Sierra, Toon Braeye, Françoise Renard, Sereina Herzog, Patrick Lusyne,  
946 Johan Van der Heyden, Herman Van Oyen, Pierre Van Damme, and Niel Hens. Bel-  
947 gian covid-19 mortality, excess deaths, number of deaths per million, and infection fa-  
948 tality rates (8 march - 9 may 2020). *medRxiv*, 2020. doi: 10.1101/2020.06.20.20136234.  
949 URL [https://www.medrxiv.org/content/early/2020/06/20/2020.06.20.](https://www.medrxiv.org/content/early/2020/06/20/2020.06.20.20136234)  
950 [20136234](https://www.medrxiv.org/content/early/2020/06/20/2020.06.20.20136234).
- 951 [6] Y Liu, null null, S Funk, and S Flasche. The contribution of pre-symptomatic infection to  
952 the transmission dynamics of covid-2019 [version 1; peer review: 1 approved]. *Wellcome*  
953 *Open Research*, 5(58), 2020. doi: 10.12688/wellcomeopenres.15788.1.
- 954 [7] Wycliffe E. Wei, Zongbin Li, Calvin J. Chiew, Sarah E. Yong, Matthias P. Toh, and  
955 Vernon J. Lee. Presymptomatic Transmission of SARS-CoV-2 — Singapore, January  
956 23–March 16, 2020. *Morbidity and Mortality Weekly Report*, 69:411–415, 2020. doi:  
957 <http://dx.doi.org/10.15585/mmwr.mm6914e1>.
- 958 [8] Jeffrey Shaman and Marta Galanti. Will sars-cov-2 become endemic? *Science*, 370  
959 (6516):527–529, 2020. ISSN 0036-8075. doi: 10.1126/science.abe5960. URL [https:](https://science.sciencemag.org/content/370/6516/527)  
960 [//science.sciencemag.org/content/370/6516/527](https://science.sciencemag.org/content/370/6516/527).
- 961 [9] Lander Willem, Steven Abrams, Oana Petrof, Pietro Coletti, Elise Kuylen, Pieter Li-  
962 bin, Signe Mogelmoose, James Wambua, Sereina A. Herzog, Christel Faes, Philippe  
963 Beutels, and Niel Hens. The impact of contact tracing and household bubbles on de-  
964 confinement strategies for covid-19: an individual-based modelling study. *medRxiv*,  
965 July 2020. URL [https://www.medrxiv.org/content/10.1101/2020.07.01.](https://www.medrxiv.org/content/10.1101/2020.07.01.20144444v3.full.pdf)  
966 [20144444v3.full.pdf](https://www.medrxiv.org/content/10.1101/2020.07.01.20144444v3.full.pdf).
- 967 [10] Kurt Barbe, Susanne Blotwijk, and Wilfried Cools. Data-driven epidemiological model  
968 to monitor the sustainability of hospital care. Technical Report ICDS300420, Vrije Uni-  
969 versiteit Brussel, 2020.
- 970 [11] Steven Abrams, James Wambua, Eva Santermans, Lander Willem, Elise Kuylen, Pietro  
971 Coletti, Pieter Libin, Christel Faes, Oana Petrof, Sereina A. Herzog, Philippe Beu-  
972 tels, and Niel Hens. Modelling the early phase of the belgian covid-19 epidemic us-  
973 ing a stochastic compartmental model and studying its implied future trajectories.  
974 *Epidemics*, 35:100449, 2021. ISSN 1755-4365. doi: [https://doi.org/10.1016/j.epidem.](https://doi.org/10.1016/j.epidem.2021.100449)  
975 [2021.100449](https://doi.org/10.1016/j.epidem.2021.100449). URL [https://www.sciencedirect.com/science/article/pii/](https://www.sciencedirect.com/science/article/pii/S1755436521000116)  
976 [S1755436521000116](https://www.sciencedirect.com/science/article/pii/S1755436521000116).
- 977 [12] Nicolas Franco. Covid-19 belgium: Extended seir-qd model with nursing homes and  
978 long-term scenarios-based forecasts. *medRxiv*, 2020. doi: 10.1101/2020.09.07.20190108.

REFERENCES

REFERENCES

- 979 [13] Lander Willem. Restore, 2021. URL <https://covid-en-wetenschap.github.io/restore.html>.  
980
- 981 [14] Lander Willem, Kim Van Kerckhove, Dennis L. Chao, Niel Hens, and Philippe Beutels.  
982 A nice day for an infection? weather conditions and social contact patterns relevant  
983 to influenza transmission. *PLOS ONE*, 7(11):1–7, 11 2012. doi: 10.1371/journal.pone.  
984 0048695.
- 985 [15] Google LLC. Google covid-19 community mobility reports, 2020. URL <https://www.google.com/covid19/mobility/>.  
986
- 987 [16] Jonathan Goodman and Jonathan Weare. Ensemble samplers with affine invariance.  
988 *Communications in Applied Mathematics and Computational Science*, 5(1):65–80, January  
989 2010. doi: 10.2140/camcos.2010.5.65.
- 990 [17] Pietro Coletti, James Wambua, Amy Gimma, Lander Willem, Sarah Vercruyse, Bieke  
991 Vanhoutte, Christopher I Jarvis, Kevin Van Zandvoort, John Edmunds, Philippe  
992 Beutels, and Niel Hens. CoMix: comparing mixing patterns in the Belgian pop-  
993 ulation during and after lockdown. *Scientific Reports*, 10(1):21885, 2020. ISSN  
994 2045-2322. doi: 10.1038/s41598-020-78540-7. URL <https://doi.org/10.1038/s41598-020-78540-7>.  
995
- 996 [18] William Ogilvy Kermack, A. G. McKendrick, and Gilbert Thomas Walker. A contri-  
997 bution to the mathematical theory of epidemics. *Proceedings of the Royal Society of Lon-*  
998 *don. Series A, Containing Papers of a Mathematical and Physical Character*, 115(772):700–  
999 721, 1927. doi: 10.1098/rspa.1927.0118. URL <https://royalsocietypublishing.org/doi/abs/10.1098/rspa.1927.0118>.  
1000
- 1001 [19] Joseph T Wu, Kathy Leung, and Gabriel M Leung. Nowcasting and forecasting the  
1002 potential domestic and international spread of the 2019-ncov outbreak originating in  
1003 wuhan, china: a modelling study. *The Lancet*, 395(10225):689 – 697, 2020. ISSN  
1004 0140-6736. doi: [https://doi.org/10.1016/S0140-6736\(20\)30260-9](https://doi.org/10.1016/S0140-6736(20)30260-9). URL <http://www.sciencedirect.com/science/article/pii/S0140673620302609>.  
1005
- 1006 [20] Richard L. Tillett, Joel R. Sevinsky, Paul D. Hartley, Heather Kerwin, Natalie Craw-  
1007 ford, Andrew Gorzalski, Chris Laverdure, Subhash C. Verma, Cyprian C. Rossetto,  
1008 David Jackson, Megan J. Farrell, Stephanie Van Hooser, and Mark Pandori. Ge-  
1009 nomic evidence for reinfection with SARS-CoV-2: a case study. *The Lancet Infec-*  
1010 *tious Diseases*, 21(1):52–58, jan 2021. ISSN 14744457. doi: 10.1016/S1473-3099(20)  
1011 30764-7. URL <http://www.ncbi.nlm.nih.gov/pubmed/33058797><http://www.pubmedcentral.nih.gov/articlerender.fcgi?artid=PMC7550103>.  
1012

REFERENCES

REFERENCES

- 1013 [21] Belen Prado-Vivar, Monica Becerra-Wong, Juan Jose Guadalupe, Sully Marquez,  
1014 Bernardo Gutierrez, Patricio Rojas-Silva, Michelle Grunauer, Gabriel Trueba, Veronica  
1015 Barragan, and Paul Cardenas. COVID-19 Re-Infection by a Phylogenetically Distinct  
1016 SARS-CoV-2 Variant, First Confirmed Event in South America. *SSRN Electronic Journal*,  
1017 2020. ISSN 1556-5068. doi: 10.2139/ssrn.3686174. URL [https://www.ssrn.com/  
1018 abstract=3686174](https://www.ssrn.com/abstract=3686174).
- 1019 [22] Jan Van Elslande, Pieter Vermeersch, Kris Vandervoort, Tony Wawina-Bokalanga, Bert  
1020 Vanmechelen, Elke Wollants, Lies Laenen, Emmanuel André, Marc Van Ranst, Katrien  
1021 Lagrou, and Piet Maes. Symptomatic Severe Acute Respiratory Syndrome Coronavirus  
1022 2 (SARS-CoV-2) Reinfection by a Phylogenetically Distinct Strain. *Clinical Infectious Dis-  
1023 eases*, 09 2020. doi: 10.1093/cid/ciaa1330.
- 1024 [23] Vivek Gupta, Rahul C Bhojar, Abhinav Jain, Saurabh Srivastava, Rashmi Upadhayay,  
1025 Mohamed Imran, Bani Jolly, Mohit Kumar Divakar, Disha Sharma, Paras Sehgal, Gyan  
1026 Ranjan, Rakesh Gupta, Vinod Scaria, and Sridhar Sivasubbu. Asymptomatic Reinfec-  
1027 tion in 2 Healthcare Workers From India With Genetically Distinct Severe Acute Respi-  
1028 ratory Syndrome Coronavirus 2. *Clinical Infectious Diseases*, 09 2020. ISSN 1058-4838.  
1029 doi: 10.1093/cid/ciaa1451. URL <https://doi.org/10.1093/cid/ciaa1451>.  
1030 ciaa1451.
- 1031 [24] Jason Rosado, Stéphane Pelleau, Charlotte Cockram, Sarah H el ene Merkle, Nari-  
1032 mane Nekkab, Caroline Demeret, Annalisa Meola, Solen Kerneis, Benjamin Terrier,  
1033 Samira Fafi-Kremer, Jerome de Seze, Timoth e Bruel, Fran ois Dejardin, St ephane Pe-  
1034 tres, Rhea Longley, Arnaud Fontanet, Marija Backovic, Ivo Mueller, and Michael T  
1035 White. Multiplex assays for the identification of serological signatures of SARS-  
1036 CoV-2 infection: an antibody-based diagnostic and machine learning study. *The  
1037 Lancet. Microbe*, 2(2):e60–e69, feb 2021. ISSN 2666-5247. doi: 10.1016/S2666-5247(20)  
1038 30197-X. URL <http://www.ncbi.nlm.nih.gov/pubmed/33521709>  
1039 [http://  
www.pubmedcentral.nih.gov/articlerender.fcgi?artid=PMC7837364](http://www.pubmedcentral.nih.gov/articlerender.fcgi?artid=PMC7837364).
- 1040 [25] Adam K Wheatley, Jennifer A Juno, Jing J Wang, Kevin J Selva, Arnold Reynaldi, Hyon-  
1041 Xhi Tan, Wen Shi Lee, Kathleen M Wragg, Hannah G Kelly, Robyn Esterbauer, Saman-  
1042 tha K Davis, Helen E Kent, Francesca L Mordant, Timothy E Schlub, David L Gordon,  
1043 David S Khoury, Kanta Subbarao, Deborah Cromer, Tom P Gordon, Amy W Chung,  
1044 Miles P Davenport, and Stephen J Kent. Evolution of immune responses to SARS-  
1045 CoV-2 in mild-moderate COVID-19. *Nature Communications*, 12(1):1162, 2021. ISSN  
1046 2041-1723. doi: 10.1038/s41467-021-21444-5. URL [https://doi.org/10.1038/  
1047 s41467-021-21444-5](https://doi.org/10.1038/s41467-021-21444-5).
- 1048 [26] Russell M. Viner, Oliver T. Mytton, Chris Bonell, G. J. Melendez-Torres, Joseph Ward,  
1049 Lee Hudson, Claire Waddington, James Thomas, Simon Russell, Fiona van der Klis,

REFERENCES

REFERENCES

- 1050 Archana Koirala, Shamez Ladhani, Jasmina Panovska-Griffiths, Nicholas G. Davies,  
1051 Robert Booy, and Rosalind M. Eggo. Susceptibility to SARS-CoV-2 Infection Among  
1052 Children and Adolescents Compared With Adults: A Systematic Review and Meta-  
1053 analysis. *JAMA Pediatrics*, 175(2):143–156, 02 2021. ISSN 2168-6203. doi: 10.1001/  
1054 jamapediatrics.2020.4573. URL [https://doi.org/10.1001/jamapediatrics.](https://doi.org/10.1001/jamapediatrics.2020.4573)  
1055 2020.4573.
- 1056 [27] O Diekmann, J.A.P. Heesterbeek, and Metz J.A.J. On the definition and the computation  
1057 of the basic reproduction ratio  $R_0$  in models for infectious diseases in heterogeneous  
1058 populations. *Journal of mathematical biology*, 28(4):365–382, 1990. ISSN 0303-6812 (Print).  
1059 doi: 10.1007/BF00178324.
- 1060 [28] O Diekmann, J.A.P. Heesterbeek, and Roberts M.G. The construction of next-  
1061 generation matrices for compartmental epidemic models. *Journal of the Royal*  
1062 *Society, Interface*, 7(47):873–885, jun 2010. ISSN 1742-5662. doi: 10.1098/rsif.  
1063 2009.0386. URL <https://pubmed.ncbi.nlm.nih.gov/19892718>[https://www.](https://www.ncbi.nlm.nih.gov/pmc/articles/PMC2871801/)  
1064 [ncbi.nlm.nih.gov/pmc/articles/PMC2871801/](https://www.ncbi.nlm.nih.gov/pmc/articles/PMC2871801/).
- 1065 [29] Xi He, Eric H Y Lau, Peng Wu, Xilong Deng, Jian Wang, Xinxin Hao, Yiu Chung Lau,  
1066 Jessica Y Wong, Yujuan Guan, Xinghua Tan, Xiaoneng Mo, Yanqing Chen, Baolin Liao,  
1067 Weilie Chen, Fengyu Hu, Qing Zhang, Mingqiu Zhong, Yanrong Wu, Lingzhai Zhao,  
1068 Fuchun Zhang, Benjamin J Cowling, Fang Li, and Gabriel M Leung. Temporal dy-  
1069 namics in viral shedding and transmissibility of COVID-19. *Nature Medicine*, 26(5):  
1070 672–675, 2020. doi: 10.1038/s41591-020-0869-5. URL [https://doi.org/10.1038/](https://doi.org/10.1038/s41591-020-0869-5)  
1071 [s41591-020-0869-5](https://doi.org/10.1038/s41591-020-0869-5).
- 1072 [30] Yang Liu, Li-Meng Yan, Lagen Wan, Tian-Xin Xiang, Aiping Le, Jia-Ming Liu, Malik  
1073 Peiris, Leo L M Poon, and Wei Zhang. Viral dynamics in mild and severe cases of  
1074 COVID-19. *The Lancet Infectious Diseases*, 0(0), 2020. ISSN 1473-3099. doi: 10.1016/  
1075 S1473-3099(20)30232-2.
- 1076 [31] Francois-Xavier Lescure, Lila Bouadma, Duc Nguyen, Marion Parisey, Paul-Henri  
1077 Wicky, Sylvie Behillil, Alexandre Gaymard, Maude Bouscambert-Duchamp, Flora Do-  
1078 nati, Quentin Le Hingrat, Vincent Enouf, Nadhira Houhou-Fidouh, Martine Valette,  
1079 Alexandra Mailles, Jean-Christophe Lucet, France Mentre, Xavier Duval, Diane  
1080 Descamps, Denis Malvy, Jean-François Timsit, Bruno Lina, Sylvie Van-der Werf, and  
1081 Yazdan Yazdanpanah. Clinical and virological data of the first cases of COVID-19 in  
1082 Europe: a case series. *The Lancet Infectious Diseases*, 0(0), 2020. ISSN 1473-3099. doi:  
1083 10.1016/S1473-3099(20)30200-0.
- 1084 [32] Kelvin Kai-Wang To, Owen Tak-Yin Tsang, Wai-Shing Leung, Anthony Ray-  
1085 mond Tam, Tak-Chiu Wu, David Christopher Lung, Cyril Chik-Yan Yip, Jian-

REFERENCES

REFERENCES

- 1086 Piao Cai, Jacky Man-Chun Chan, Thomas Shiu-Hong Chik, Daphne Pui-Ling  
1087 Lau, Chris Yau-Chung Choi, Lin-Lei Chen, Wan-Mui Chan, Kwok-Hung Chan,  
1088 Jonathan Daniel Ip, Anthony Chin-Ki Ng, Rosana Wing-Shan Poon, Cui-Ting Luo,  
1089 Vincent Chi-Chung Cheng, Jasper Fuk-Woo Chan, Ivan Fan-Ngai Hung, Zhiwei  
1090 Chen, Honglin Chen, and Kwok-Yung Yuen. Temporal profiles of viral load in  
1091 posterior oropharyngeal saliva samples and serum antibody responses during in-  
1092 fection by SARS-CoV-2: an observational cohort study. *The Lancet Infectious Dis-*  
1093 *eases*, 20(5):565–574, may 2020. ISSN 1473-3099. doi: 10.1016/S1473-3099(20)  
1094 30196-1. URL [https://www.thelancet.com/journals/laninf/article/](https://www.thelancet.com/journals/laninf/article/PIIS1473-3099(20)30196-1/fulltext)  
1095 [PIIS1473-3099\(20\)30196-1/fulltext](https://www.thelancet.com/journals/laninf/article/PIIS1473-3099(20)30196-1/fulltext){#}.XsE5ulFUln8.mendeley.
- 1096 [33] Lirong Zou, Feng Ruan, Mingxing Huang, Lijun Liang, Huitao Huang, Zhongsi Hong,  
1097 Jianxiang Yu, Min Kang, Yingchao Song, Jinyu Xia, Qianfang Guo, Tie Song, Jianfeng  
1098 He, Hui-Ling Yen, Malik Peiris, and Jie Wu. Sars-cov-2 viral load in upper respiratory  
1099 specimens of infected patients. *New England Journal of Medicine*, 382(12):1177–1179, 2020.  
1100 doi: 10.1056/NEJMc2001737. URL <https://doi.org/10.1056/NEJMc2001737>.  
1101 PMID: 32074444.
- 1102 [34] Ruiyun Li, Sen Pei, Bin Chen, Yimeng Song, Tao Zhang, Wan Yang, and Jeffrey  
1103 Shaman. Substantial undocumented infection facilitates the rapid dissemination of  
1104 novel coronavirus (sars-cov2). *Science*, 2020. ISSN 0036-8075. doi: 10.1126/science.  
1105 abb3221. URL [https://science.sciencemag.org/content/early/2020/03/](https://science.sciencemag.org/content/early/2020/03/13/science.abb3221)  
1106 [13/science.abb3221](https://science.sciencemag.org/content/early/2020/03/13/science.abb3221).
- 1107 [35] Daniel F. Gudbjartsson, Agnar Helgason, Hakon Jonsson, Olafur T. Magnusson, Pall  
1108 Melsted, Gudmundur L. Norddahl, Jona Saemundsdottir, Asgeir Sigurdsson, Patrick  
1109 Sulem, Arna B. Agustsdottir, Berglind Eiriksdottir, Run Fridriksdottir, Elisabet E. Gar-  
1110 darsdottir, Gudmundur Georgsson, Olafia S. Gretarsdottir, Kjartan R. Gudmunds-  
1111 son, Thora R. Gunnarsdottir, Arnaldur Gylfason, Hilma Holm, Brynjar O. Jens-  
1112 son, Aslaug Jonasdottir, Frosti Jonsson, Kamilla S. Josefsdottir, Thordur Kristjansson,  
1113 Droplaug N. Magnusdottir, Louise le Roux, Gudrun Sigmundsdottir, Gardar Svein-  
1114 bjornsson, Kristin E. Sveinsdottir, Maney Sveinsdottir, Emil A. Thorarensen, Bjarni  
1115 Thorbjornsson, Arthur Löve, Gisli Masson, Ingileif Jonsdottir, Alma D. Möller, Thorol-  
1116 fur Gudnason, Karl G. Kristinsson, Unnur Thorsteinsdottir, and Kari Stefansson.  
1117 Spread of sars-cov-2 in the icelandic population. *New England Journal of Medicine*, 0  
1118 (0):null, 2020. doi: 10.1056/NEJMoa2006100. URL [https://doi.org/10.1056/](https://doi.org/10.1056/NEJMoa2006100)  
1119 [NEJMoa2006100](https://doi.org/10.1056/NEJMoa2006100).
- 1120 [36] Diana Buitrago-Garcia, Dianne Egli-Gany, Michel J. Counotte, Stefanie Hossmann, Hira  
1121 Imeri, Aziz Mert Ipekci, Georgia Salanti, and Nicola Low. Occurrence and transmis-  
1122 sion potential of asymptomatic and presymptomatic SARS-CoV-2 infections: A living

REFERENCES

REFERENCES

- 1123 systematic review and meta-analysis. *PLOS Medicine*, 17(9):e1003346, sep 2020. ISSN  
1124 1549-1676. doi: 10.1371/journal.pmed.1003346. URL [https://dx.plos.org/10.](https://dx.plos.org/10.1371/journal.pmed.1003346)  
1125 [1371/journal.pmed.1003346](https://dx.plos.org/10.1371/journal.pmed.1003346).
- 1126 [37] Joseph T Wu, Kathy Leung, Mary Bushman, Nishant Kishore, Rene Niehus, Pablo M  
1127 de Salazar, Benjamin J Cowling, Marc Lipsitch, and Gabriel M Leung. Estimating clin-  
1128 ical severity of COVID-19 from the transmission dynamics in Wuhan, China. *Nature*  
1129 *Medicine*, 26(4):506–510, 2020. ISSN 1546-170X. doi: 10.1038/s41591-020-0822-7. URL  
1130 <https://doi.org/10.1038/s41591-020-0822-7>.
- 1131 [38] Natalie M Linton, Tetsuro Kobayashi, Yichi Yang, Katsuma Hayashi, Andrei R Akhmet-  
1132 zhanov, Sung-Mok Jung, Baoyin Yuan, Ryo Kinoshita, and Hiroshi Nishiura. Incubation  
1133 Period and Other Epidemiological Characteristics of 2019 Novel Coronavirus Infections  
1134 with Right Truncation: A Statistical Analysis of Publicly Available Case Data. *Journal of*  
1135 *clinical medicine*, 9(2), feb 2020. ISSN 2077-0383 (Print). doi: 10.3390/jcm9020538.
- 1136 [39] Sereina Herzog, Jessie De Bie, Steven Abrams, Ine Wouters, Esra Ekinci, Lisbeth Pat-  
1137 teet, Astrid Coppens, Sandy De Spiegeleer, Philippe Beutels, Pierre Van Damme, Niel  
1138 Hens, and Heidi Theeten. Seroprevalence of igg antibodies against sars coronavirus 2  
1139 in belgium – a serial prospective cross-sectional nationwide study of residual samples.  
1140 *medRxiv*, 2021. doi: 10.1101/2020.06.08.20125179. URL [https://www.medrxiv.org/](https://www.medrxiv.org/content/early/2021/04/07/2020.06.08.20125179)  
1141 [content/early/2021/04/07/2020.06.08.20125179](https://www.medrxiv.org/content/early/2021/04/07/2020.06.08.20125179).
- 1142 [40] Nina Van Goethem, Aline Vilain, Chloé Wyndham-Thomas, Jessika Deblonde, Nathalie  
1143 Bossuyt, Tinne Lernout, Javiera Rebolledo Gonzalez, Sophie Quoilin, Vincent Melis,  
1144 and Dominique Van Beckhoven. Rapid establishment of a national surveillance of  
1145 COVID-19 hospitalizations in Belgium. *Archives of Public Health*, 78(1):121, 2020. ISSN  
1146 2049-3258. doi: 10.1186/s13690-020-00505-z. URL [https://doi.org/10.1186/](https://doi.org/10.1186/s13690-020-00505-z)  
1147 [s13690-020-00505-z](https://doi.org/10.1186/s13690-020-00505-z).
- 1148 [41] Christel Faes, Steven Abrams, Dominique Van Beckhoven, Geert Meyfroidt, Erika  
1149 Vlieghe, Niel Hens, and Belgian Collaborative Group on COVID-19 Hospital Surveil-  
1150 lance. Time between symptom onset, hospitalisation and recovery or death: Statis-  
1151 tical analysis of belgian covid-19 patients. *International Journal of Environmental Re-*  
1152 *search and Public Health*, 17(20), 2020. doi: 10.3390/ijerph17207560. URL [https:](https://www.mdpi.com/1660-4601/17/20/7560)  
1153 [//www.mdpi.com/1660-4601/17/20/7560](https://www.mdpi.com/1660-4601/17/20/7560).
- 1154 [42] Ahmet Aktay, Shailesh Bavadekar, Gwen Cossoul, John Davis, Damien Desfontaines,  
1155 Alex Fabrikant, Evgeniy Gabrilovich, Krishna Gadepalli, Bryant Gipson, Miguel Gue-  
1156 vara, Chaitanya Kamath, Mansi Kansal, Ali Lange, Chinmoy Mandayam, Andrew  
1157 Oplinger, Christopher Pluntke, Thomas Roessler, Arran Schlosberg, Tomer Shekel,  
1158 Swapnil Vispute, Mia Vu, Gregory Wellenius, Brian Williams, and Royce J. Wilson.



REFERENCES

REFERENCES

- 1159 Google COVID-19 community mobility reports: Anonymization process description  
1160 (version 1.0). *CoRR*, abs/2004.04145, 2020. URL [https://arxiv.org/abs/2004.](https://arxiv.org/abs/2004.04145)  
1161 04145.
- 1162 [43] M. Sulyok and M. Walker. Community movement and covid-19: a global study using  
1163 google’s community mobility reports. *Epidemiology and Infection*, 148, 2020. doi: 10.  
1164 1017/S0950268820002757.
- 1165 [44] Joël Mossong, Niel Hens, Mark Jit, Philippe Beutels, Kari Auranen, Rafael Mikola-  
1166 jczyk, Marco Massari, Stefania Salmaso, Gianpaolo Scalia Tomba, Jacco Wallinga, Jan-  
1167 neke Heijne, Malgorzata Sadkowska-Todys, Magdalena Rosinska, and W. John Ed-  
1168 munds. Social contacts and mixing patterns relevant to the spread of infectious dis-  
1169 eases. *PLOS Medicine*, 5(3):1–1, 03 2008. doi: 10.1371/journal.pmed.0050074. URL  
1170 <https://doi.org/10.1371/journal.pmed.0050074>.
- 1171 [45] J. Kennedy and R. Eberhart. Particle swarm optimization. In *Proceedings of ICNN’95 -*  
1172 *International Conference on Neural Networks*, volume 4, pages 1942–1948 vol.4, 1995.
- 1173 [46] Lorenzo Pellis, Francesca Scarabel, Helena B. Stage, Christopher E. Overton, Lauren  
1174 H. K. Chappell, Elizabeth Fearon, Emma Bennett, Katrina A. Lythgoe, Thomas A.  
1175 House, Ian Hall, and null null. Challenges in control of covid-19: short doubling time  
1176 and long delay to effect of interventions. *Philosophical Transactions of the Royal Society B:*  
1177 *Biological Sciences*, 376(1829):20200264, 2021. doi: 10.1098/rstb.2020.0264. URL [https://](https://royalsocietypublishing.org/doi/abs/10.1098/rstb.2020.0264)  
1178 [royalsocietypublishing.org/doi/abs/10.1098/rstb.2020.0264](https://royalsocietypublishing.org/doi/abs/10.1098/rstb.2020.0264).
- 1179 [47] Zunyou Wu and Jennifer M. McGoogan. Characteristics of and important lessons from  
1180 the coronavirus disease 2019 (covid-19) outbreak in china: Summary of a report of 72314  
1181 cases from the chinese center for disease control and prevention. *JAMA*, 02 2020. ISSN  
1182 0098-7484. doi: 10.1001/jama.2020.2648.
- 1183 [48] CDC COVID-19 Response Team. Severe Outcomes Among Patients with Coronavirus  
1184 Disease 2019 (COVID-19) - United States, February 12-March 16, 2020. *Morbidity and*  
1185 *Mortality Weekly Report*, 69:343–346, 2020. doi: [http://dx.doi.org/10.15585/mmwr.](http://dx.doi.org/10.15585/mmwr.mm6912e2)  
1186 [mm6912e2](http://dx.doi.org/10.15585/mmwr.mm6912e2).
- 1187 [49] Bindu Vekaria, Christopher Overton, Arkadiusz Wisniowski, Shazaad Ahmad, Andrea  
1188 Aparicio-Castro, Jacob Curran-Sebastian, Jane Eddleston, Neil Hanley, Thomas House,  
1189 Jihye Kim, Wendy Olsen, Maria Pampaka, Lorenzo Pellis, Diego Perez Ruiz, John  
1190 Schofield, Nick Shryane, and Mark Elliot. Hospital Length of Stay For COVID-19 Pa-  
1191 tients: Data-Driven Methods for Forward Planning. *BMC Infectious Diseases*, 2021. ISSN  
1192 2693-5015. doi: 10.21203/rs.3.rs-56855/v1. URL [https://doi.org/10.21203/rs.](https://doi.org/10.21203/rs.3.rs-56855/v1)  
1193 [3.rs-56855/v1](https://doi.org/10.21203/rs.3.rs-56855/v1).

REFERENCES

REFERENCES

- 1194 [50] M Vandromme, R De Pauw, B Serrien, N Van Goethem, and K Blot. Covid-19 clinical  
1195 hospital surveillance report. , Belgian Federal Institute for Public Health, 2021.
- 1196 [51] Itai Dattner, Yair Goldberg, Guy Katriel, Rami Yaari, Nurit Gal, Yoav Miron, Arnona Ziv,  
1197 Rivka Sheffer, Yoram Hamo, and Amit Huppert. The role of children in the spread of  
1198 covid-19: Using household data from bnei brak, israel, to estimate the relative suscep-  
1199 tibility and infectivity of children. *PLOS Computational Biology*, 17(2):1–19, 02 2021. doi:  
1200 10.1371/journal.pcbi.1008559. URL [https://doi.org/10.1371/journal.pcbi.](https://doi.org/10.1371/journal.pcbi.1008559)  
1201 1008559.
- 1202 [52] Kim Van Kerckhove, Niel Hens, W John Edmunds, and Ken T D Eames. The impact  
1203 of illness on social networks: implications for transmission and control of influenza.  
1204 *American journal of epidemiology*, 178(11):1655–1662, dec 2013. ISSN 1476-6256. doi: 10.  
1205 1093/aje/kwt196. URL <https://pubmed.ncbi.nlm.nih.gov/24100954><https://www.ncbi.nlm.nih.gov/pmc/articles/PMC3842903/>.
- 1207 [53] Belgian Federal Gouvernement. De trends van de afgelopen dagen zetten  
1208 zich voort, 2020. URL [https://www.info-coronavirus.be/nl/news/](https://www.info-coronavirus.be/nl/news/trends-laatste-dagen-zetten-zich-door/)  
1209 [trends-laatste-dagen-zetten-zich-door/](https://www.info-coronavirus.be/nl/news/trends-laatste-dagen-zetten-zich-door/).
- 1210 [54] StatBEL. Structure of the Population, 2020. URL [https://statbel.fgov.be/en/](https://statbel.fgov.be/en/themes/population/structure-population{#}panel-11)  
1211 [themes/population/structure-population{#}panel-11](https://statbel.fgov.be/en/themes/population/structure-population{#}panel-11).
- 1212 [55] Sven Whatty. Tijdelijke werkloosheid bijna gehalveerd. *Het Laatste*  
1213 *Nieuws*, June 2020. URL [https://www.hln.be/de-krant/](https://www.hln.be/de-krant/tijdelijke-werkloosheid-bijna-gehalveerd~a092a080/?referer=https%3A%2F%2Fwww.google.be%2F)  
1214 [tijdelijke-werkloosheid-bijna-gehalveerd~a092a080/?referer=](https://www.hln.be/de-krant/tijdelijke-werkloosheid-bijna-gehalveerd~a092a080/?referer=https%3A%2F%2Fwww.google.be%2F)  
1215 [https%3A%2F%2Fwww.google.be%2F](https://www.hln.be/de-krant/tijdelijke-werkloosheid-bijna-gehalveerd~a092a080/?referer=https%3A%2F%2Fwww.google.be%2F).
- 1216 [56] Tommy Thijs. Alles op alles om italiaanse situatie te vermijden. *Het*  
1217 *Laatste Nieuws*, March 2020. URL [https://www.hln.be/binnenland/](https://www.hln.be/binnenland/alles-op-alles-om-italiaans-scenario-te-vermijden-deze-grafiek-toont-aan-waar)  
1218 [alles-op-alles-om-italiaans-scenario-te-vermijden-deze-grafiek-toont-aan-waar](https://www.hln.be/binnenland/alles-op-alles-om-italiaans-scenario-te-vermijden-deze-grafiek-toont-aan-waar)
- 1219 [57] Open VLD. Coronavirus : België heeft z'n exitstrate-  
1220 gie vastgelegd, 2020. URL [https://www2.openvld.be/](https://www2.openvld.be/coronavirus-belgie-heeft-zn-exitstrategie-vastgelegd/)  
1221 [coronavirus-belgie-heeft-zn-exitstrategie-vastgelegd/](https://www2.openvld.be/coronavirus-belgie-heeft-zn-exitstrategie-vastgelegd/).
- 1222 [58] Vlaamse regering. Heropstart van de lessen op school: wie, waarom  
1223 en hoe, 2020. URL [https://onderwijs.vlaanderen.be/nl/](https://onderwijs.vlaanderen.be/nl/heropstart-lessen-op-school-wie-waarom-hoe)  
1224 [heropstart-lessen-op-school-wie-waarom-hoe](https://onderwijs.vlaanderen.be/nl/heropstart-lessen-op-school-wie-waarom-hoe).
- 1225 [59] Stijn Cools. Antwerpen voert avondklok in. *De Standaard*, July 2020. URL [https://www.standaard.be/cnt/dmf20200727\\_97687460](https://www.standaard.be/cnt/dmf20200727_97687460).  
1226 [https://www.standaard.be/cnt/dmf20200727\\_97687460](https://www.standaard.be/cnt/dmf20200727_97687460).

REFERENCES

REFERENCES

- 1227 [60] Jan-Frederik Abbeloos. Alle munitie uit de kast om dijkbreuk te vermijden. *De*  
1228 *Standaard*, Oct 2020. URL [https://www.standaard.be/cnt/dmf20201016\\_](https://www.standaard.be/cnt/dmf20201016_97421280)  
1229 97421280.
- 1230 [61] Jan-Frederik Abbeloos. 'dit zijn de maatregelen van de laatste kans'. *De Standaard*, Oct  
1231 2020. URL [https://www.standaard.be/cnt/dmf20201030\\_97719827](https://www.standaard.be/cnt/dmf20201030_97719827).
- 1232 [62] Dries De Smet. De britse variant is niet meer te stuiten, de britse golf wel. *De Standaard*,  
1233 Jan 2021. URL [https://www.standaard.be/cnt/dmf20210128\\_94562948](https://www.standaard.be/cnt/dmf20210128_94562948).
- 1234 [63] Koen Snoekx. Vaccinaties in rusthuizen komen in stroomversnelling. *De Standaard*, Jan  
1235 2021. URL [https://www.standaard.be/cnt/dmf20210111\\_97978032](https://www.standaard.be/cnt/dmf20210111_97978032).
- 1236 [64] Philip Hartman. A lemma in the theory of structural stability of differential equations.  
1237 *Proceedings of the American Mathematical Society*, 11:610–620, 1960.
